# Supplementary material for: Gut-targeted nanoparticles deliver specifically targeted antimicrobial peptides against Clostridium perfringens infections
Source: PubMed Central journal article supplement — Sci Adv. 2023 Sep 29;9(39):eadf8782. doi: 10.1126/sciadv.adf8782 (PMC10541502; doi:10.1126/sciadv.adf8782), 2023-09-29
Supplement: sciadv.adf8782_sm.pdf [file sciadv.adf8782_sm.pdf]

Supplementary Materials for  
**Gut-targeted nanoparticles deliver specifically targeted antimicrobial peptides against *Clostridium perfringens* infections**

Bocheng Xu *et al.*

Corresponding author: Yizhen Wang, yzwang321@zju.edu.cn; Mingliang Jin, mljin@zju.edu.cn

*Sci. Adv.* **9**, eadf8782 (2023)  
DOI: 10.1126/sciadv.adf8782

**The PDF file includes:**

Experimental Section  
Figs. S1 to S23  
Tables S1 to S10  
Legend for data S1

**Other Supplementary Material for this manuscript includes the following:**

Data S1

## Experimental Section

**Bacterial Strains and growth conditions:** The strains *E. coli* ATCC25922, *E. coli* O157:H7, *S. aureus* ATCC 25932, *E. faecalis* ATCC 29212, *S. typhimurium* ATCC 14028, *A. baumannii* ATCC 19606, *S. flexneri* ATCC 12022 were obtained from College of Animal Science, Zhejiang University (Hangzhou, China). *C. perfringens* ATCC 13124 was purchased from Guangdong Microbial Culture Collection Center (Guangzhou, China). *S. aureus* USA300 were obtained from Hangzhou Bio Sci co. ltd. The *C. perfringens* ATCC 13124 was cultured in a reinforced clostridium medium (RCM) or Mueller–Hinton Broth (MHB) for 24 hours in anaerobic environment. The other bacterial strains were cultivated in MHB with shaking at 225 rpm. Cultures were synchronized to exponential phase and standardized for each experiment based on OD<sub>600</sub>. For all assays in this experiment, 100 μL of the test solution was added to the wells of a 96-well plate, and the optical density was measured using a microplate reader.

**Materials:** MHB, RCM, and phosphate buffered saline (PBS) were obtained from Solarbio (China). Tryptone-Sulfite-Cycloserine Agar (TSCA) was obtained from Hopebio-Technology (China). Bovine serum albumin (BSA), N-phenyl-1-naphthylamine (NPN), Propidium iodide (PI), 3,3-dipropylthiadicarbocyanine (DiSC<sub>3-5</sub>), Triton X-100, 1-anilino-8-naphthalene sulfonate (ANS), Sodium dodecyl sulfate (SDS), 4-(2-hydroxyethyl) piperazine-1-ethanesulfonic acid (HEPES) were purchased from Sigma-Aldrich (China). Dimethyl formamide (DMF) was purchased from Aladdin (China). The Ph. D-12 Phage Display Peptide Library was purchased from New England Biolabs (USA). Methylthiazolyldiphenyl-tetrazolium bromide (MTT) was purchased from APEX BIO (China). D-Cycloserine, Kanamycin, Gentamicin, Colistin, Metronidazole, and Vancomycin were obtained from MACKUN (China). BCA Kit were purchased from Abbkine (China). 2,3-bis(2-methoxy-4-nitro-5-sulfophenyl)-2H-tetrazolium-5-carboxanilide (XTT) Kit was purchased from KeyGEN BioTECH (China). Mouse *C. perfringens* alpha-toxin (CPA), TNF- $\alpha$ , IL-6, and IL-1 $\beta$  enzyme-linked immunosorbent assay (ELISA) Kit were purchased from Shanghai Hengya Biological Technology Co. Ltd (China).

**Machine Learning Model:** The machine learning (ML) model was established for predicting the

activity levels of AMPs against intestinal infection pathogens. We obtain the minimal inhibitory concentration (MIC) of 1621 special AMPs (against *S. aureus*, *E. coli*, *S. typhimurium*, *A. baumannii*, *S. flexneri*, *C. difficile*, or *C. perfringens*, etc.) from DBAASP (<https://dbaasp.org/home>). Meanwhile, we computed 93 features according to their sequences, and applied the following MIC thresholds: high activity (0  $\mu\text{g/mL}$ , 32  $\mu\text{g/mL}$ ), low activity (32  $\mu\text{g/mL}$ , 128  $\mu\text{g/mL}$ ), no activity (128  $\mu\text{g/mL}$ ,  $+\infty$ ). BorderlineSMOTE was used for oversampling. The dataset was randomly split into 80% training and 20% test data. AutoGluon was used to establish the ML prediction models, and 26 ML models with 10-fold cross-validation was measured. The code was completely executed according to AutoGluon's reference case (<https://auto.gluon.ai/stable/index.html>). The relevant dataset, code, and model are available on Dryad (DOI: 10.5061/dryad.31zcrjds7) and GitHub ([https://github.com/xubocheng/Anti\\_Cp.git](https://github.com/xubocheng/Anti_Cp.git)).

**Peptide synthesis and property calculations.** The peptides developed in this study were synthesized at GL Biochem Ltd (Shanghai, China) and purified to >95%. The quality of each peptide was indicated by mass spectrometry (MS) and high-performance liquid chromatography (HPLC). The mean hydrophobicity  $\langle H \rangle$  and mean amphipathic moment  $\langle \mu H \rangle$  were calculated by HeliQuest (<https://heliquest.ipmc.cnrs.fr/>). The physicochemical parameters were computed with DBAASP (40) (<https://dbaasp.org/home>). The predicted structure for the peptides generated using Iterative Threading ASSEmbly Refinement (I-TASSER) server (<https://zhanggroup.org/I-TASSER/>).

**Circular dichroism measurements:** CD spectra of 100  $\mu\text{g/mL}$  peptides were measured in 10 mM PBS (PH 7.4), 50% TFE, and 30 mM SDS micelles on a J-1500 spectropolarimeter (Jasco; Tokyo, Japan), with a quartz cuvette (1.0 mm path length). The spectra were recorded from 195–250 nm at a scanning speed of 10 nm/min. All CD measurements were performed with an average of three technical replicates. The acquired CD spectra were then converted to the mean residue ellipticity using the following equation:  $\theta_M = (\theta_{\text{obs}} \times 1000) / (c \times l \times n)$ , where  $\theta_M$  is the mean residue ellipticity ( $\text{deg cm}^2 \text{ dmol}^{-1}$ ),  $\theta_{\text{obs}}$  is the observed ellipticity corrected for the buffer at a given wavelength (mdeg),  $c$  is the peptide concentration,  $l$  is the path length, and  $n$  is the number of amino acids. The secondary structure content of the peptides was estimated using K2D3 (<http://cbdm-01.zdv.uni-mainz.de/~andrade/k2d3/>).

**Biopanning of phage-displayed peptides:** Phage display technology was used to obtain targeted peptide domain with modifications as described previously (12). The screening antigen (*C. perfringens* ATCC 13124) and shielding antigen (*E. coli* O157:H7, *S. typhimurium* ATCC 14028, and *S. flexneri* ATCC 12022) were coupled to magnetic beads respectively, and the 12-peptide library was incubated with the shielding antigen for 1 hour; the supernatant was then magnetically separated by a magnetic frame. The supernatant was incubated with the screening antigen for 2 h. The supernatant was magnetically separated, unbound phages were washed away, and the eluate phage were bound to the original screen. For the first round of biopanning, 96-well plates were coated with 100  $\mu$ L whole cells of *C. perfringens* ATCC 13124 (50  $\mu$ g/mL) resuspended in PBS at 4°C overnight. After plates were washed with TBST thrice and blocked with 5% BSA in TBS (50 mM Tris-HCl, pH 7.5, 150 mM NaCl), the plates were incubated with 50  $\mu$ L of phage library at 37 °C for 2 h. Unbound phages were removed by six washes with 0.1% PBST and three washes with PBS. Subsequently, the bound phages were eluted by the addition of 100  $\mu$ L elution buffer (0.2 M glycine-HCl, pH 2.2, 1 mg/mL BSA) at room temperature for 8 min. After neutralization with 15  $\mu$ L 1 M Tris-HCl, pH 9.1, the eluted phages were amplified in 1 mL *E. coli* ER2738 ( $OD_{600} \approx 0.6$ ) by an infection method. The amplified phages were titred and used for the second round of biopanning. After four rounds, the eluted phages were identified by ELISA, positive clones were selected and used to prepare phage stocks to isolate phage genomic DNA for nucleotide sequencing (PRJNA884199).

**Peptide pull down assays:** Total proteins from *C. perfringens* ATCC 13124 were incubated with biotinylated F6 peptide which was combined with streptavidin magnetic beads in PBS at 4°C overnight. Streptavidin magnetic beads were used as the control group. The beads were magnetically retrieved, washed thrice with PBST, and boiled in Laemmli buffer for 10 min. Subsequently, RIPA Buffer cell lysate and loading buffer were added. The samples were boiled in boiling water for 10 min, and centrifuged at 12,000 rpm for 5 min. The supernatant was collected and resolved by SDS-PAGE; the protein bands were detected with Coomassie blue staining and identified via mass spectrometry.

**Antimicrobial activity:** The antibacterial activity of peptides was evaluated using a standard broth microdilution protocol with minor modifications. In brief, the bacteria synchronized to mid-log phase and then washed three times with PBS, subsequently standardized to a final bacterial cell solution ( $0.5-1 \times 10^6$  CFU/mL) in MHB or RCM. The MIC assays were performed using 96-well plates with the peptides doubly diluted in bovine serum albumin solution (0.2% BSA 0.01% acetic acid solution), and equal volumes of the bacterial suspension were added to each well. Untreated bacterial culture and medium as positive and negative control wells were implemented. The incubation of plates was at 37°C for 18–24h in anaerobic or aerobic environment. MIC that is the lowest peptide concentration that fully inhibited bacterial growth was observed. In particular, we determined the MIC values against *C. perfringens* under four different conditions (see fig. S3 for the experimental procedure). Specifically, *C. perfringens* was cultured in both MHB and RCM. The synchronized bacterial suspension was then diluted in either RCM or MHB to a concentration of  $0.5-1 \times 10^6$  CFU/mL for MIC experiment. There were four combinations: MM, MR, RR, and RM, where the first letter represents *C. perfringens* cultured in RCM or MHB, and the second letter represents the medium used for dilution.

**Killing kinetics assays:** *C. perfringens* ATCC 13124 were cultivated in RCM or MHB until mid-log phase, and then washed and diluted to a final bacterial cell solution in PBS. Aliquots of cultures ( $\sim 10^5$  CFU) treated with different peptides were taken at 3, 5, 10, 30, 60, and 120 min, diluted 100-fold, and plated on TSCA plates. Colonies were counted after overnight incubation in anaerobic environment at 37°C. Each test was performed on three independent experiments.

**Hemolytic assays and eukaryotic cytotoxicity:** Human red blood cells (hRBCs) obtained from a healthy donor (R.Y), who has provided written informed consent, were washed thrice with PBS and diluted to a 2% solution (v/v). After peptide treatment, the cells were incubated at 37 °C for 1 h, and centrifuged at 3500 rpm for 5 min. Aliquots of the supernatant were carefully transferred to a fresh 96-well microplate. The amount of hemoglobin released was measured at 570 nm. The percent lysis was calculated by assuming 100% release when human blood cells were treated with 2% Triton X-100, and 0% release when incubated with PBS buffer. The % hemolysis was calculated as  $(\text{treated sample} - \text{negative control}) / (\text{positive control} - \text{negative control}) \times 100\%$ . The peptide concentration

that caused 10% lysis of hRBCs is defined as HL10. The cell selectivity index (CSI) was calculated as the ratio between HL10 and MIC of the corresponding peptide against a select pathogenic species. We performed the cytotoxicity assay as previously described using CCK8 as a readout for cellular viability, with modifications for Hek293T cells. Briefly, the resuspended cells ( $1 \times 10^5$  cells per well) and peptides with different concentrations were mixed in a 96-well plate and incubated for 24 hours under a humidified atmosphere containing 5% CO<sub>2</sub> at 37 °C.

**Flow cytometry analysis:** We used flow cytometry analysis to investigate the growth model of *C. perfringens* and antibacterial tendency of HAMPs against *C. perfringens* under four culture conditions. Bacteria were cultured in MHB or RCM until reaching the logarithmic growth phase. The cells were then washed three times with PBS to remove metabolites from the RCM medium. 1) The cells were diluted in PBS to achieve an OD<sub>600</sub> of 0.1, and the diluted samples were analyzed using flow cytometry. 2) The cells were diluted in either MHB or RCM to an OD<sub>600</sub> of 0.1, followed by anaerobic cultivation at 37°C for 2 hours and 12 hours and the samples were analyzed using flow cytometry. 3) The cells were diluted in either MHB or RCM to an OD<sub>600</sub> of 0.1 and supplemented with a final concentration of 32 µg/mL of HAMPs. The cells were then cultured under anaerobic conditions at 37°C for 2 hours and 12 hours, and the samples were analyzed using flow cytometry. Vegetative cells, sporulation cells and free spores cannot be quantified in this study, so the former two are collectively referred to as rod-shaped *C. perfringens*. Flow results can only distinguish morphological changes by cell size.

**Cell wall permeabilization:** Cell wall permeability of *C. perfringens* ATCC 13124 cultivated in MHB was determined by the uptake of NPN. Briefly, logarithmic growing microbial cells were harvested (6000rpm, 3min) and diluted to OD<sub>600</sub> = 0.2 in 5 mM HEPES buffer (pH=7.4, containing 5 mM glucose). The bacterial suspension was further incubated with 10 µM NPN in the dark for 30 min. Subsequently, the different concentrations (1/2, 1, 2×MIC) of peptides were added, and the NPN fluorescence was detected (excitation  $\lambda$  =350 nm, emission  $\lambda$  = 420 nm). The untreated bacterial suspension served as a negative control, and a 10 µg/mL polymyxin B-treated bacterial suspension served as a positive control.

**PI assays:** Membrane disruption was determined by PI uptake. The bacteria were cultivated to exponential phase in MHB and diluted to an OD<sub>600</sub> of 0.02. PI was added at 10 µg/mL along with 0.5, 1, 2×MIC HAMPs and including a no treatment control sample. The samples were incubated in a 37 °C water bath for 20 and 60 minutes. Samples were then analysed using an BD Accuri flow cytometer. Data were graphed using the FlowJo software program.

**DiSC<sub>3-5</sub> assays:** Inner membrane depolarization was measured using DiSC<sub>3-5</sub> cationic dye (9). *C. perfringens* cultivated in MHB. Mid-log phase bacteria were pelleted and washed with HEPES buffer thrice, and resuspended and diluted to an OD<sub>600</sub> = 0.05 in 5 mM HEPES buffer (containing 20 mM glucose), and then 0.4 µM DiSC<sub>3-5</sub> was added in the dark for 90 min at 37 °C. The suspension was further incubated with 100 mM KCl for 30 min. Subsequently, various MIC-fold peptides were added, and fluorescence was detected (excitation λ = 622 nm, emission λ = 670 nm), until no changes were observed. Background fluorescence was also recorded. Results were normalised to relevant background controls.

**TEM of peptidies:** The morphologies of the peptides were observed using TEM. The peptide solution was diluted to 256µg/mL in 1×PBS or 50% TFE, and then placed onto carbon-coated surface of a copper grid (300 square mesh). After 1 min, the grid was stained with a 10 µL aliquot of 1% uranyl acetate three times and washed in Milli-Q water three times, the excess dye was absorbed, and the sample was air-dried for at least 15 min before imaging.

**ANS fluorescence assay:** The critical assembly concentration (CAC) of HAMPs was determined using the ANS fluorescence assay. ANS was dissolved in DMF to a concentration of 1 mM, and then 1 µL of ANS was added to 100 µL of different concentrations of peptides. Then, a microplate reader was used to measure the fluorescence spectrum of the peptide solution under an excitation wavelength of 360 nm, an emission wavelength range of 420–670 nm, and an interval of 5 nm. Finally, the corrected fluorescence intensity at a wavelength of 460 nm and the logarithm of peptide concentration for the plot were used. CAC was determined as the intersection of the two fitted straight lines.

**Antibiofilm activity:** The inhibitory and clearing effect of HAMPs and EPV@HAMPs on *C. perfringens* biofilm was evaluated using the crystal violet staining method. Briefly, *C. perfringens* cultured in RCM or MHB from the exponential phase was diluted in RCM or MHB to a concentration of  $2 \times 10^6$  CFU/mL. A 200  $\mu$ L bacterial inoculum was added to a 96-well plate and incubated anaerobically at 37°C for 24 hours to allow biofilm formation. Subsequently, the culture medium was discarded, and the wells were gently washed three times with PBS to remove planktonic bacteria. Drugs at final concentrations ranging from 8 to 256  $\mu$ g/mL in PBS were added to the 96-well plate. After further incubation anaerobically at 37°C for 24 hours, the wells were washed three times with PBS, and the biofilms were fixed with 100  $\mu$ L of methanol for 15 minutes. Then, 100  $\mu$ L of a 1% crystal violet staining solution was added and incubated at 37°C for 15-30 minutes. After washing the wells three times with PBS, the crystal violet was dissolved in 95% ethanol, and the absorbance at 595 nm was measured using a microplate reader. The quantification of biofilm (%) was calculated using the formula  $[(A - A_o)/(A_{untreated} - A_o)] \times 100\%$ , where A represents the absorbance of the current well,  $A_o$  represents the absorbance of the blank well, and  $A_{untreated}$  represents the absorbance of the well with established biofilm treated with PBS. It is important to note that each step before adding the solution should be air-dried at room temperature for 5 minutes. To avoid disrupting the biofilm during the washing steps, the plate was gently inverted and submerged in a glass container filled with PBS, and slight shaking was applied. The anti-biofilm formation assay is similar to the MIC assays, with the only difference being the inoculum size (50  $\mu$ L  $2 \times 10^7$  CFU/mL). The subsequent quantification of the biofilm remains consistent with the aforementioned tests.

In addition, we employed the XTT assay to assess the viability of planktonic bacteria and bacteria in biofilm. Consistent with the aforementioned protocol, after 24 hours of treatment with the antimicrobials (without the removal of planktonic bacteria), 10  $\mu$ L of the XTT solution was added to each well and the plates were further incubated at 37°C for 2-4 h. Due to the significant impact of uneven bacterial distribution on optical density measurements, quantitative measurements at OD<sub>450nm</sub> were not employed in this experiment.

**Localization of FITC-Labeled Peptides:** Midlogarithmic growth-phase *C. perfringens* was washed PBS thrice and diluted on an OD<sub>600</sub> = 0.3 in PBS. 64  $\mu$ g/mL FITC-peptides and 10  $\mu$ M PI were



incubated with bacteria in the dark for 60 min at 37°C. Post incubation, 1 mL suspension was harvested (6000 rpm, 3 min), washed with PBS thrice, and then resuspended to 80 µL. 3 µL samples were examined with a confocal laser scanning microscope (LSM 880, Germany) and the data were processed using Zen 2010 software.

**TEM Observation of the Morphological Changes of Bacteria:** Exponential phase bacteria were treated with 2×MIC of peptides, and fixed with glutaraldehyde (2.5%, w v<sup>-1</sup>) at 4 °C overnight. For TEM observation, the sample was first dehydrated by a graded series of ethanol (30%, 50%, 70%, 80%) for ~15 min at each step, and dehydrated with a graded series of acetone (90%, 95%) for ~15 min at each step. Subsequently, the samples were dehydrated twice using absolute acetone for 20 min. The specimens were placed in 1:1 mixture of absolute acetone and the final Spurr resin mixture for 1 hour at room temperature, transferred to 1:3 mixture of absolute acetone and the final resin mixture for 3 h, and to the final Spurr resin mixture overnight. Specimens were placed in Eppendorf tubes containing Spurr resin and heated at 70 °C for > 9 h. The specimens were sectioned with a LEICA EM UC7 ultratome, stained with uranyl acetate and alkaline lead citrate for 5–10 min each, and observed with a Hitachi Model H-7650 TEM.

**In Vivo Toxicity Assessment:** 35 healthy female C57BL/6 mice (6 weeks old) were randomly assigned to seven cages (5 per cage). Animal cages were kept individually in ventilated cages (IVCs) at a temperature of 20 to 24°C, humidity of 50 to 60%, 60 air exchanges per hour and a 12/12-hour light/dark cycle. Mice were acclimated in the facility for two days prior to experimentation. The mice were intraperitoneally injected (I.P.) with 100 µL of PBS or different concentration peptide solutions (10, 20, 30 mg/kg) diluted with PBS. During the five days, the toxicity scores and changes in body weight were monitored. At the end of the experiments (on the 5th day), all animals were sacrificed with subsequent cervical dislocation, organ harvesting, colon length measuring. The liver, kidney, lung, and spleen were weighed and fixed with 4% paraformaldehyde for H&E staining. Blood samples were acquired from the orbital vein of mice. The blood biochemical factors including ALT, ALP, TBIL, BUN, and CREA were measured with an automatic biochemical analyzer to reflect hepatic and renal damage.

**Biodistribution of HAMPs:** Biodistribution of FITC-peptides in mice were measured by *in vivo* imaging system. For appropriate dose and time, a pre-experiment was conducted. 6 healthy female C57BL/6 mice (6–8 weeks old) were randomized into three experimental groups, namely control group, FITC-F6P1 group, and FITC-F6P6 group. At 2h or 10h after I.P. 20mg/kg FITC-HAMPs, mice and organs was imaged by *in vivo* imaging system. From 2 to 10 hours, HAMPs were from systemic to peritoneal distribution. Meanwhile, the FITC-HAMPs in the liver and kidney were depleted, and the residence time in the intestine was longer (fig. S23). The above results are consistent with the absorption route of intraperitoneal drug delivery, so we adjusted the experiment as follows. 9 healthy female C57BL/6 mice (6–8 weeks old) were randomized into three experimental groups. At 12h after 5mg/kg I.P. HAMPs, mice were euthanized. Major organs including gut, heart, liver, spleen, kidney, lung, and intestine were isolated. Mice and organs were imaged by *in vivo* imaging system.

**Synthesis of gut-targeted nanoparticles:** The logarithmic-growing *Microcystis* was cultured and placed in a light incubator at a slow speed (70 rotations/min) for 12 hours, and then 500 mL of cultured medium were centrifuged for collecting gas vesicles (GVs). The *Salmonella typhi* was cultured with medium containing lysozyme (0.1 mg/mL) at 37°C for 1.5 hour, and centrifuged for collecting the cytoderm particles (CPs). The Digalactosyldiacylglycerol (DGDG), Monogalactosyldiacylglycerol (MGDG), phosphatidic acid (PA), biotin, and CPs were dissolved with dichloromethane (DCM) in glass tubes and mixed them in a ratio of 2:1:5:1:1. After that, the mixed solution was transferred to a pear-shaped flask with biotin loading lipid thin film (BLTF) prepared from the raw lipids and CPs, and the flask was sonicated with repeated pipetting. Collection of the BLTFs: The mixed solution was centrifuged after decomposition for 3 hours at 4°C and 9000 rpm. Finally, the GV, AMP, and BLTFs were mixed in BTS buffer and sonicated with repeated pipetting for synthesizing engineering particle vaccine (EPV) for 12h at 4°C. Afterward, the EPVs were collected for subsequently experiments.

### ***In Vivo Activity Assessment***

**Experiment 1:** To disrupt colonization resistance and enable infection with *C. perfringens*, 25 healthy female C57BL/6 mice (6 weeks old) were provided with an antibiotic cocktail (0.4 mg/mL

Kanamycin, 0.035 mg/ mL Gentamicin, 850U/ mL Colistin, 0.215 mg/ mL Metronidazole, 0.045 mg/ mL Vancomycin) added in their drinking water (from day -6 to day -3). Mice were then switched to regular drinking water. On day -1, mice were I.P. with clindamycin (30 mg/kg). On day 0, mice were challenged with *C. perfringens* ATCC 13124 inoculation ( $10^6$  spores) cultured in RCM (termed R group) or MHB (termed M group) by oral gavage. At 24 hours post-infection, the R and M groups were randomly divided into three subgroups and received intraperitoneal injections of 100  $\mu$ L of either 20 mg/kg F6P1, 20 mg/kg F6P6, or PBS. The PBS-treated group served as the control group. The six groups were named as follows: R (n = 5), R+F6P1 (n = 5), R+F6P6 (n = 5), M (n = 5), M+F6P1 (n = 5), and M+F6P6 (n = 5). To monitor *C. perfringens* colonization, fecal samples were collected, weighed, and diluted with 0.1% peptone water. Colonic tissues were weighed and homogenized in 0.1% peptone solution. The CFUs were quantified by plating serial dilutions on TSCA plates supplemented with 0.05% D-cycloserine and incubated anaerobically at 37°C.

*Experiment 2:* 25 healthy female C57BL/6 mice (6-8 weeks old) were provided with an antibiotic cocktail added in their drinking water (from day -6 to day -3). Mice were then switched to regular drinking water. On day -1, mice were I.P. with clindamycin (30 mg/kg). On day 0, mice were challenged with *C. perfringens* ATCC 13124 inoculation ( $10^6$  spores) cultured in RCM by oral gavage and mice were randomly assigned to five treatment groups: 20 mg/kg F6P1 (n = 5), 20 mg/kg F6P6 (n = 5),  $3 \times 10^9$  EPV@F6P1 (n = 5),  $3 \times 10^9$  EPV@F6P6 (n = 5), and 1×PBS (n = 5). Beginning at 24 and 72 hours after *C. perfringens* challenge, mice were I.P. HAMPs, EPV@HAMPs, or PBS. To monitor *C. perfringens* colonization, fecal samples were exclusively collected, weighed and diluted with 0.1% peptone water. Colonic tissues were weighed and homogenized in 0.1% peptone water. CFUs were quantified using TSCA plates supplemented with 0.05% D-cycloserine at 37°C under anaerobic conditions. Five groups of mice were sacrificed at 144 hours post infection. Blood samples and colon samples were obtained for evaluation of cytokine levels (TNF- $\alpha$ , IL-6, and IL-1 $\beta$ ) and CPA levels. The tissue samples were fixed in 4% paraformaldehyde for H&E staining and immunofluorescence staining.

*Experiment 3:* On day -1, mice were I.P. with clindamycin (100 mg/kg). On day 0, mice were infected with *C. perfringens* ATCC 13124 inoculation ( $10^5$  spores) by oral gavage. On day 1, the mice were given an I.P. injection of 100 mg/kg clindamycin. Beginning at 2 hours, 1 day, 3 days and 5 days after antibiotic treatment, the mice were given an I.P. injection of 20 mg/kg F6P6,  $3 \times 10^9$

EPV@F6P6, or PBS vehicle. Fecal samples were collected and weighed, and CFU/g were enumerated in feces. Three groups of mice were sacrificed at 10 days post infection. Colonic content and tissue were collected and enumerated. The colonic tissue was fixed in 4% paraformaldehyde for H&E staining.

***The effects of HAMPs and EPV@HAMPs on healthy mice:*** 25 female C57BL/6 mice (6-8 weeks old) were divided into five groups after a three-day acclimation period. Over the course of three consecutive days (0, 1, 2 day), each group received a 100  $\mu$ L intraperitoneal injection of either PBS, 20 mg/kg F6P1, 20 mg/kg F6P6,  $3 \times 10^9$  EPV@F6P1, or  $3 \times 10^9$  EPV@F6P6. On the fifth day, blood, organs, and colon tissues were collected from the mice. Serum was separated for ELISA analysis of inflammatory cytokine levels. Organs such as liver, kidney, spleen, and lungs were weighed, and a portion of the colon was fixed in 4% paraformaldehyde for 24 hours to enable immunofluorescence analysis.

***Microbiome Analysis:*** Feces of each mouse were collected separately and stored at  $-80$  °C. Microbial DNA was obtained from fecal homogenates using the E.Z.N.A. Stool DNA Kit (Omega Bio-Tek, USA). To ensure that no contamination had occurred, the concentration and purity of the DNA samples were measured with a NanoDrop 2000 UV-vis spectrophotometer (Thermo Scientific, USA) and examined by electrophoresis using 1% agarose gels. The V4 gene regions of the bacterial 16S rRNA gene were amplified with the primer pairs 515 F (5'-GTGCCAGCMGCCGCGG-3') and 806 R (5'-GGACTACHVGGGTWTCTAAT-3') using the Illumina MiSeq platform at Shanghai Majorbio Biopharm Technology Co., Ltd. (Shanghai, China). Thereinto, operational taxonomic units (OTUs) were clustered in UPARSE (version 7.1). Then, the taxonomy of the OTU representative sequence was evaluated by using RDP Classifier. All data were finally analyzed on the Majorbio Biocloud platform and R. The sequence data were then deposited in the Sequence Read Archive under the accession number PRJNA857195.

### Database Filtering Technology

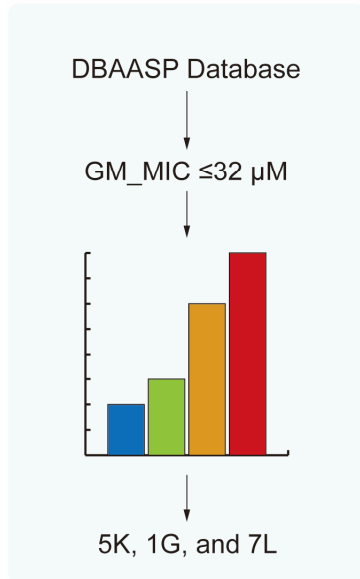

### Traversal Design Strategy

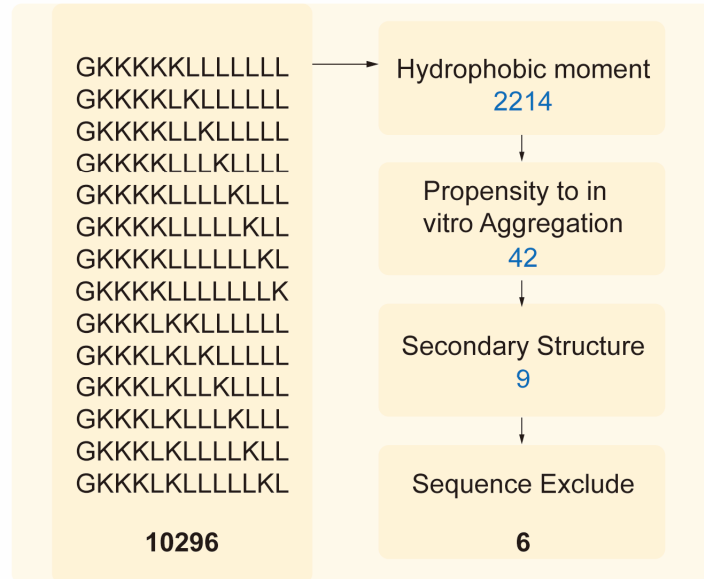

fig. S1 Sequence screening process of traversal design. GM\_MIC: Geometric mean of MIC.

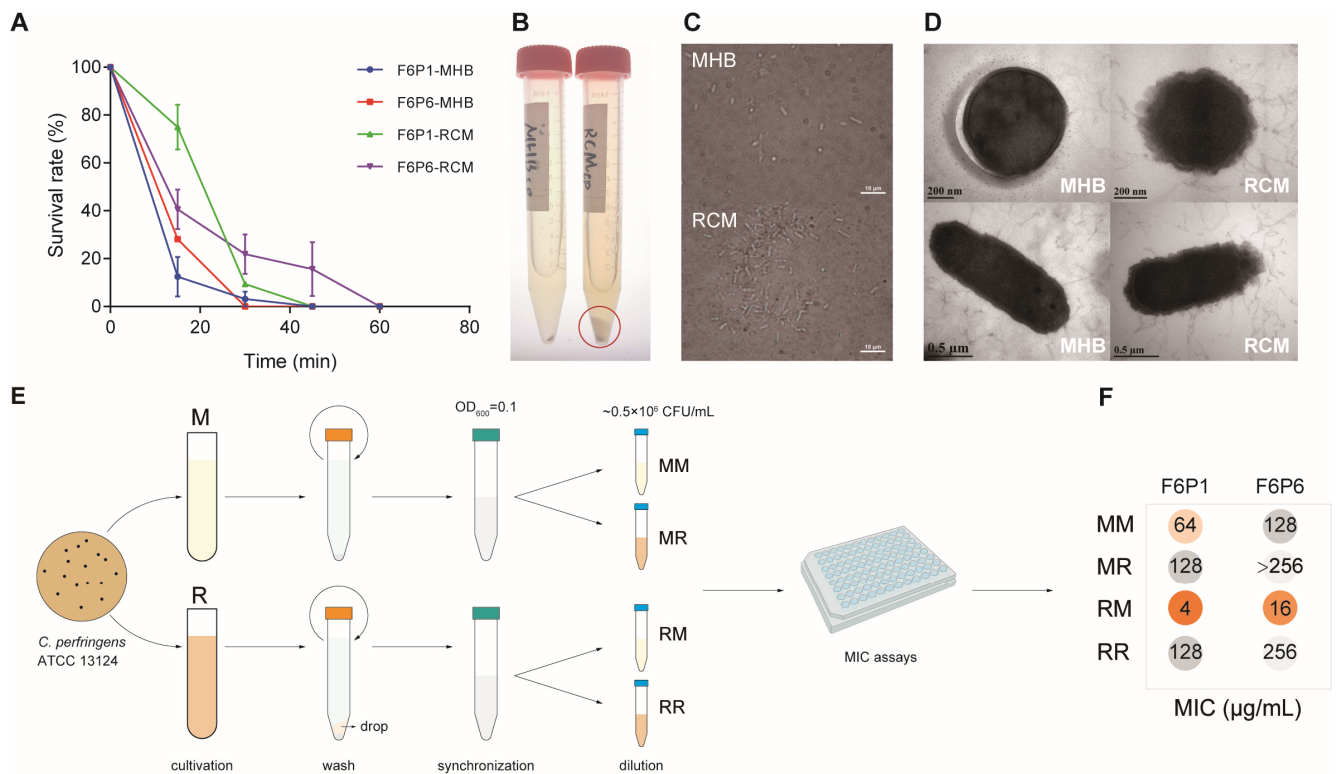

fig. S2 HAMPs against *C. perfringens* under different conditions. (A) Bactericidal killing kinetics assay. Data are presented as the mean  $\pm$  SEM ( $n = 3$ , biologically independent samples). (B) Differences in centrifugation of *C. perfringens* cultured in MHB and RCM. (C) Microscopy imaging of *C. perfringens* cultured in MHB and RCM. India ink staining was used to show the capsule of *C. perfringens*. (D) TEM imaging of *C. perfringens* cultured in MHB or RCM. Scale bars, 0.2 or 0.5  $\mu\text{m}$ . (E) Experimental design of MIC determination. (F) MIC values of F6P1 and F6P6 on *C. perfringens* in different culture conditions.

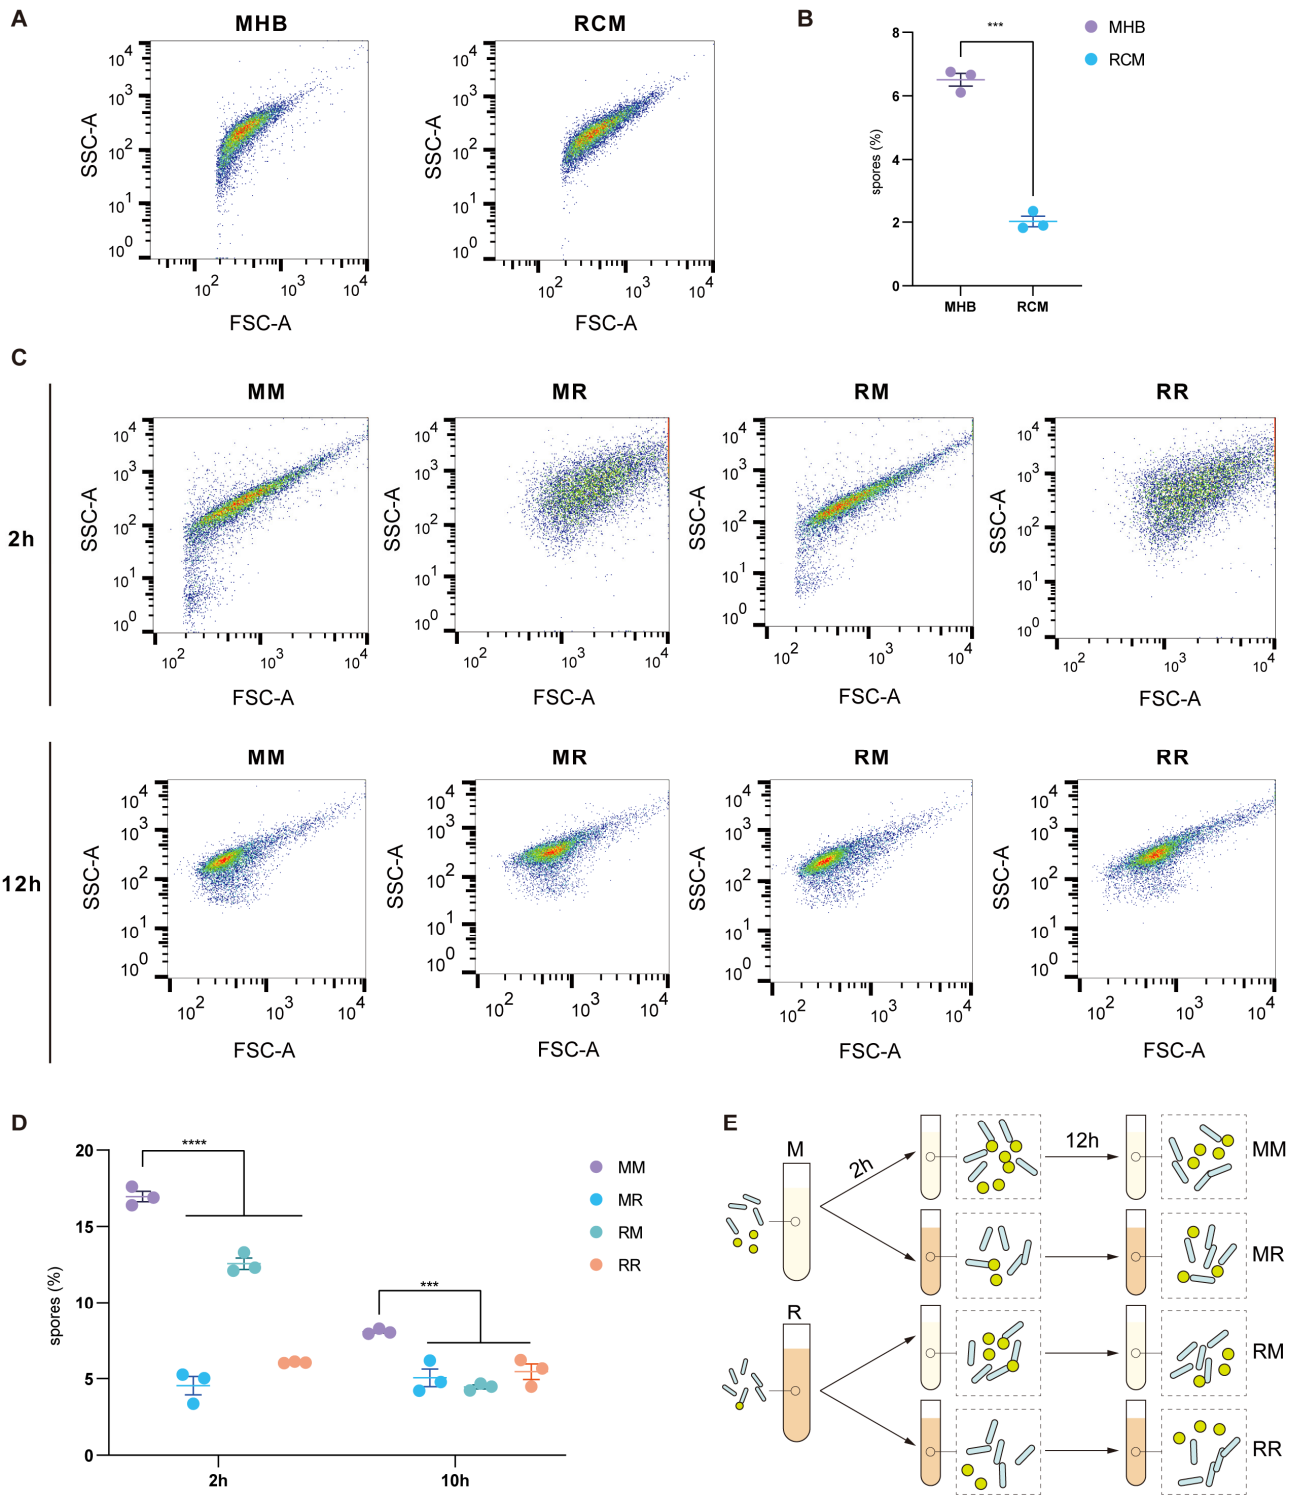

**fig. S3 Flow cytometric analysis of the growth model of *C. perfringens* under different culture conditions.** (A and B) Flow cytometric analysis (A) and spore ratio statistics (B) of *C. perfringens* overnight cultured in MHB and RCM. (C and D) Flow cytometric analysis (C) and spore ratio statistics (D) of *C. perfringens* cultured for 2 hours and 12 hours under four different culture conditions. (E) Growth pattern of *C. perfringens* in four conditions (a total of 4 conditions, namely MM, MR, RR, RM).

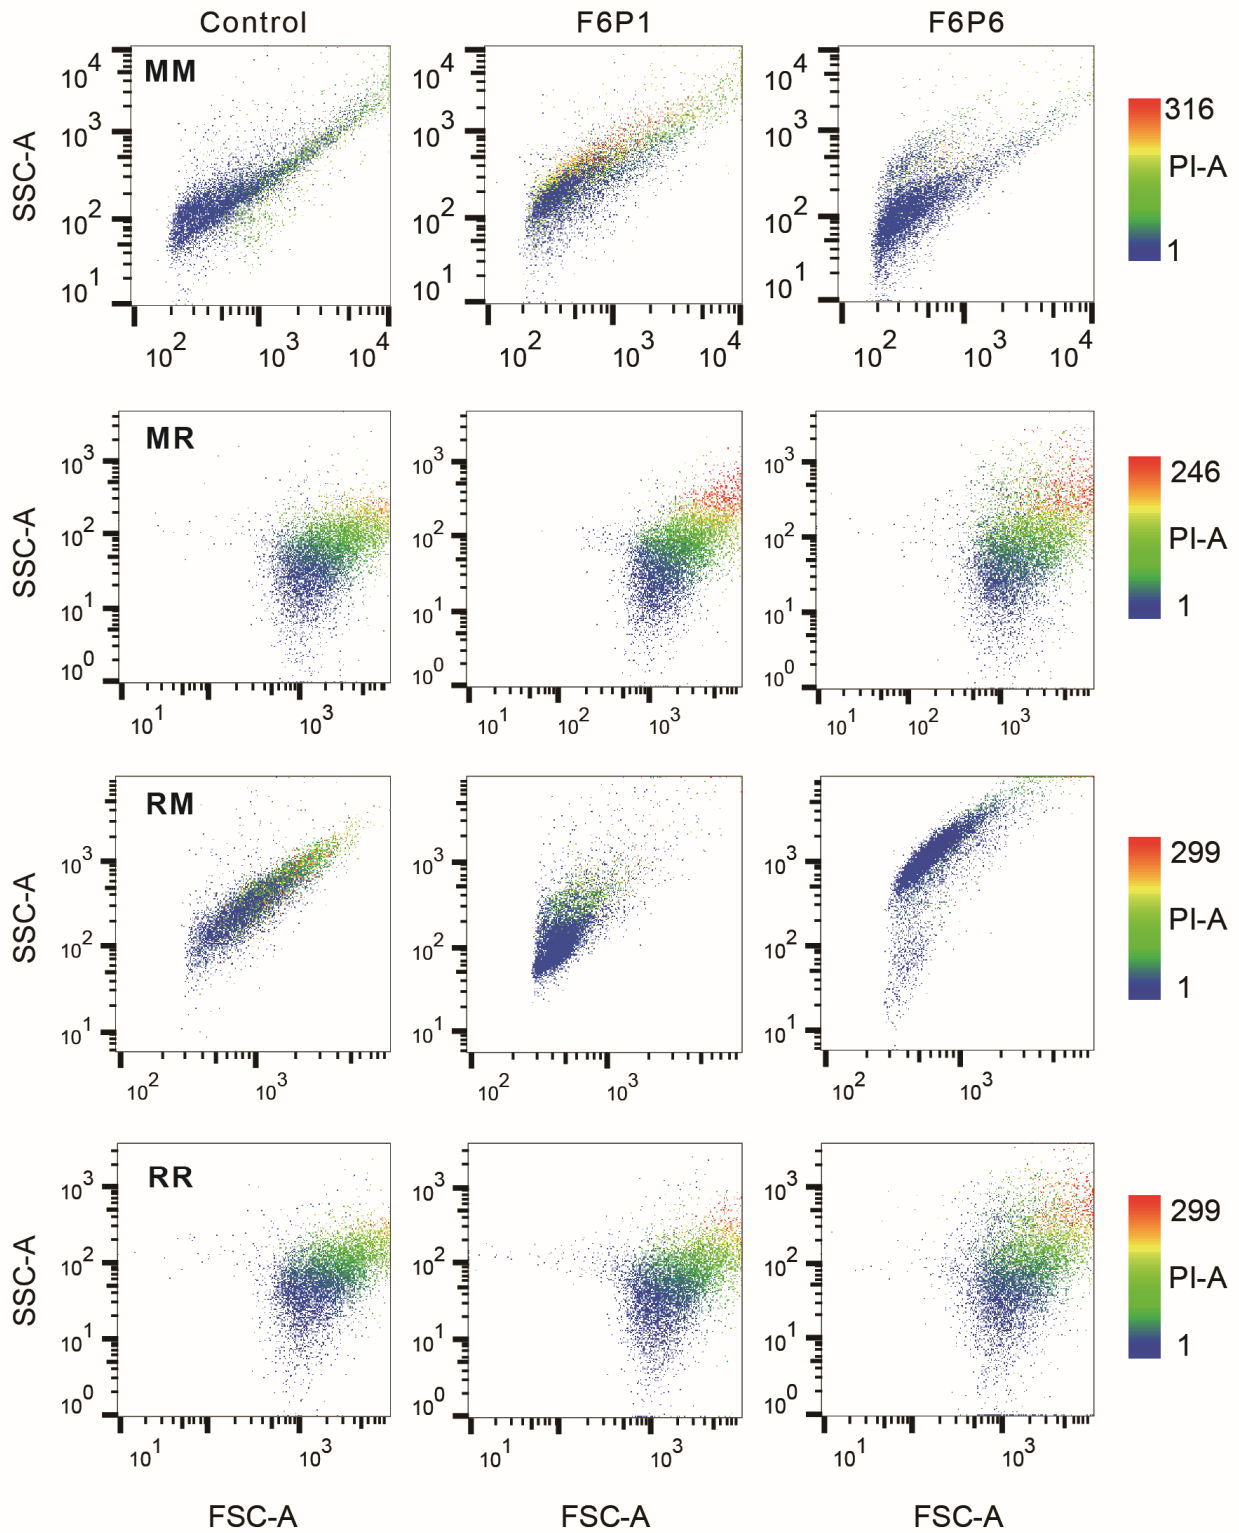

fig. S4 Antibacterial tendency assay of HAMPs against *C. perfringens* under four conditions. Inoculate RCM and MHB with  $10^7$  CFU/mL *C. perfringens* cultured in RCM or MHB. After two hours of cultivation, 32  $\mu\text{g}/\text{mL}$  HAMPs treated them for 1 hour, and HAMPs preferentially destroyed rod-shaped *C. perfringens*.



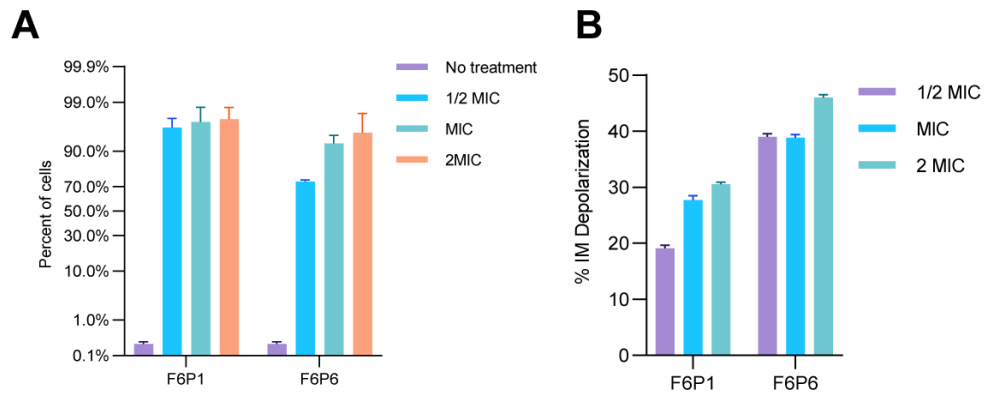

fig. S5 **PI and DiSC<sub>3-5</sub> assays.** (A) PI-positive cells detected via flow cytometry for *C. perfringens* treated with F6P1 and F6P6. Values are the mean  $\pm$  SEM (n=3 biological replicates). (B) Statistical plot of DiSC<sub>3-5</sub> assays. Values are the mean  $\pm$  SEM (n=4 biological replicates).

**A****Elimination of established biofilm**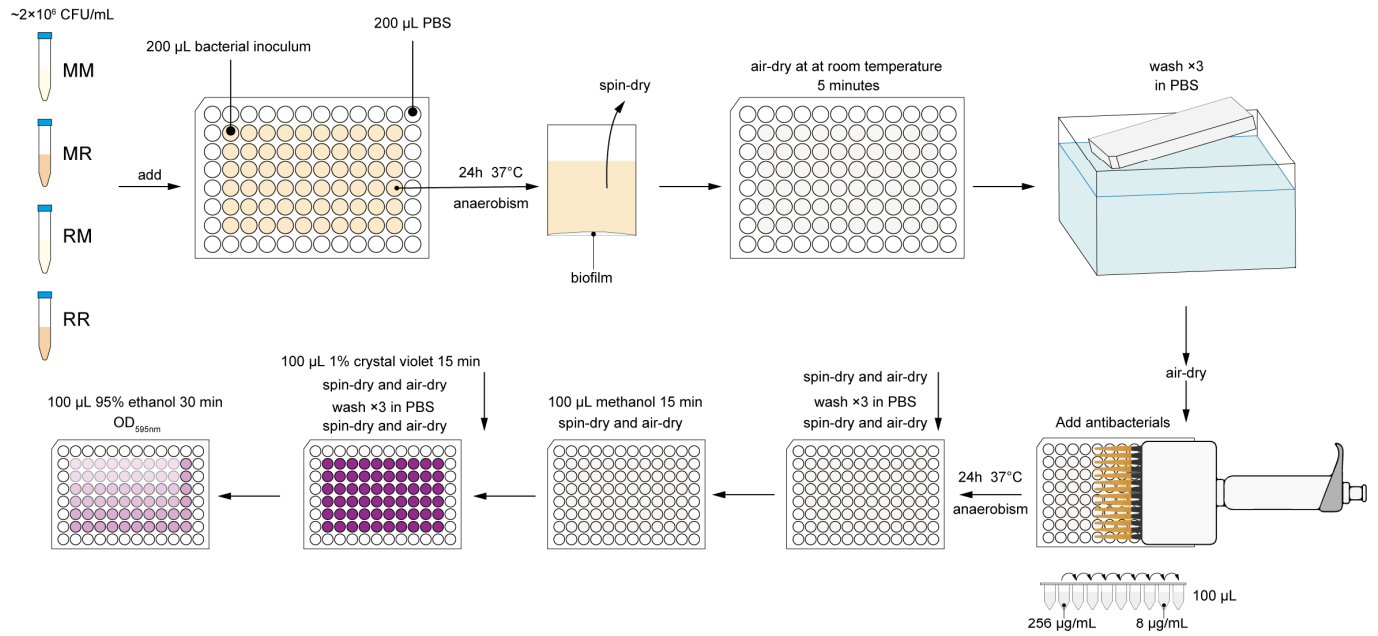**B**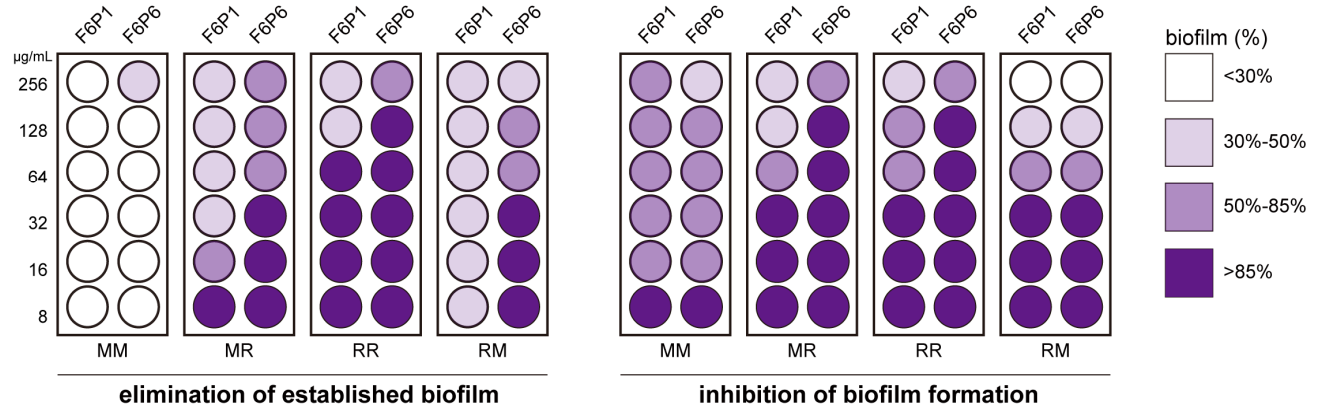

**fig. S6 Anti-biofilm activity of HAMPs.** (A) Experimental procedure for clearing established biofilms by HAMPs. The anti-biofilm formation assay involves rearranging the dosing step from the elimination of established biofilm assays to the initial step. (B) Cleaning of biofilm (left) and inhibition of biofilm formation (right) by HAMPs under four conditions (n=3 biological replicates).

**A F6P1**

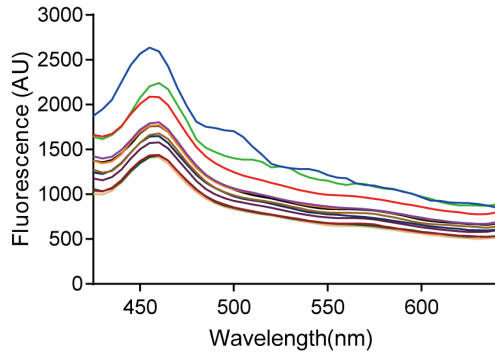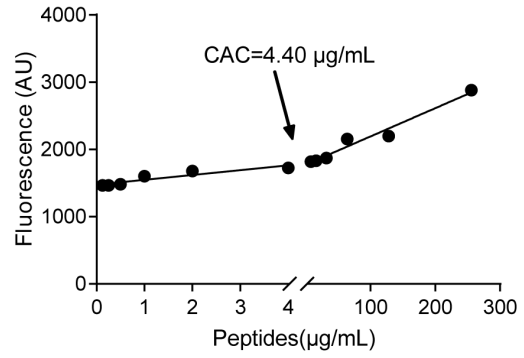

**B F6P6**

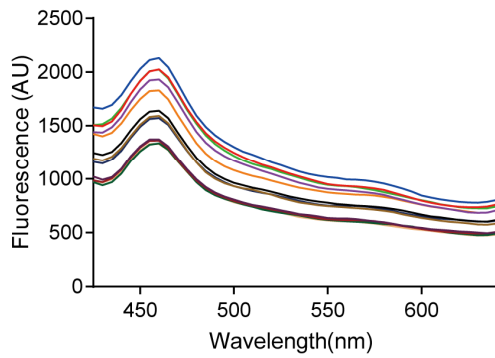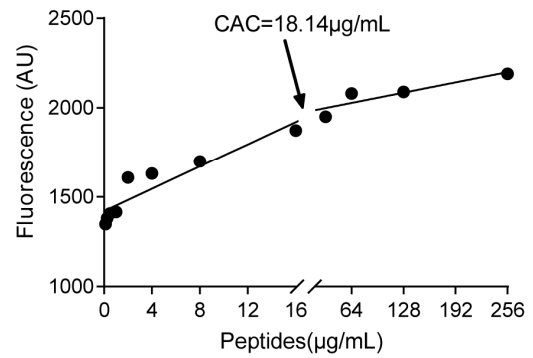

256  $\mu\text{g/mL}$  64  $\mu\text{g/mL}$  16  $\mu\text{g/mL}$  4  $\mu\text{g/mL}$  1  $\mu\text{g/mL}$  0.25  $\mu\text{g/mL}$   
128  $\mu\text{g/mL}$  32  $\mu\text{g/mL}$  8  $\mu\text{g/mL}$  2  $\mu\text{g/mL}$  0.5  $\mu\text{g/mL}$  0.125  $\mu\text{g/mL}$

fig. S7 **Self-assembling ability and the critical aggregation concentration of HAMPs in water environment.** All ANS assays performed with an average of three technical replicates.

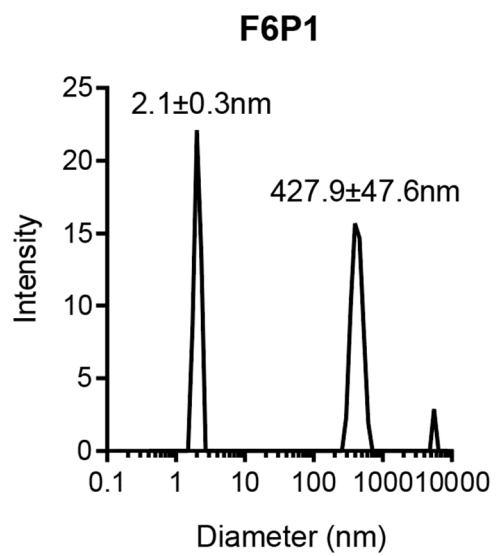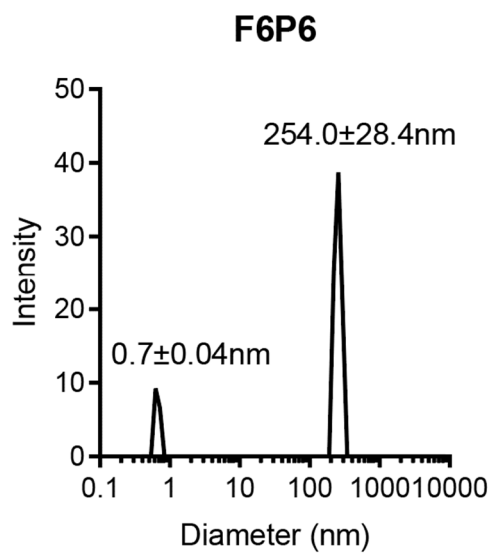

fig. S8 The diameter of HAMPs.

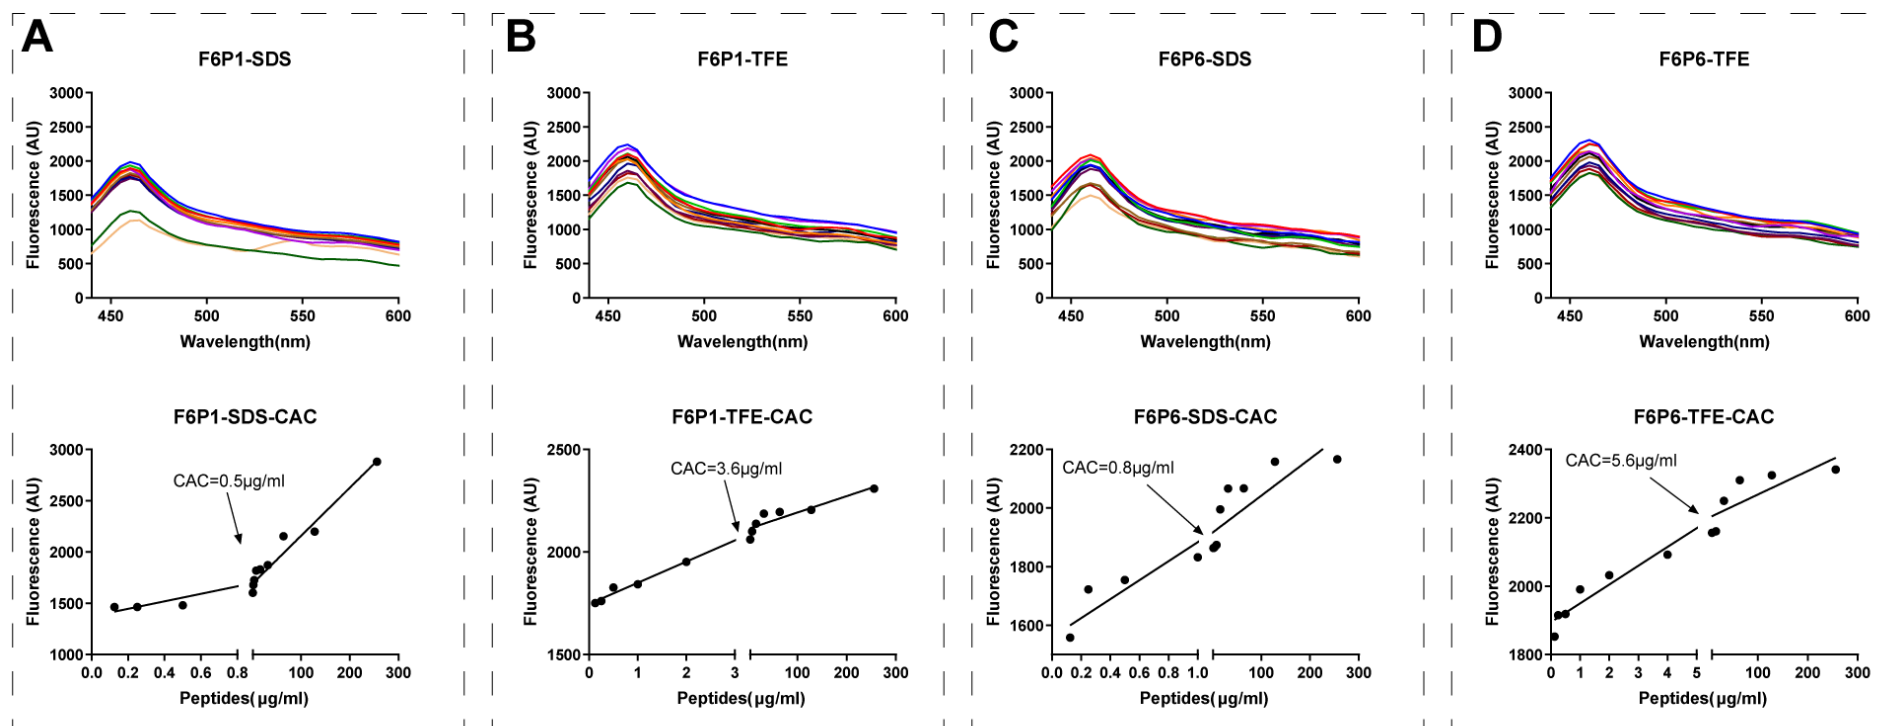

256  $\mu\text{g/ml}$  64  $\mu\text{g/ml}$  16  $\mu\text{g/ml}$  4  $\mu\text{g/ml}$  1  $\mu\text{g/ml}$  0.25  $\mu\text{g/ml}$   
 128  $\mu\text{g/ml}$  32  $\mu\text{g/ml}$  8  $\mu\text{g/ml}$  2  $\mu\text{g/ml}$  0.5  $\mu\text{g/ml}$  0.125  $\mu\text{g/ml}$

fig. S9 Self-assembling ability and the critical aggregation concentration of HAMPs in SDS and TFE. All ANS assays performed with an average of three technical replicates.

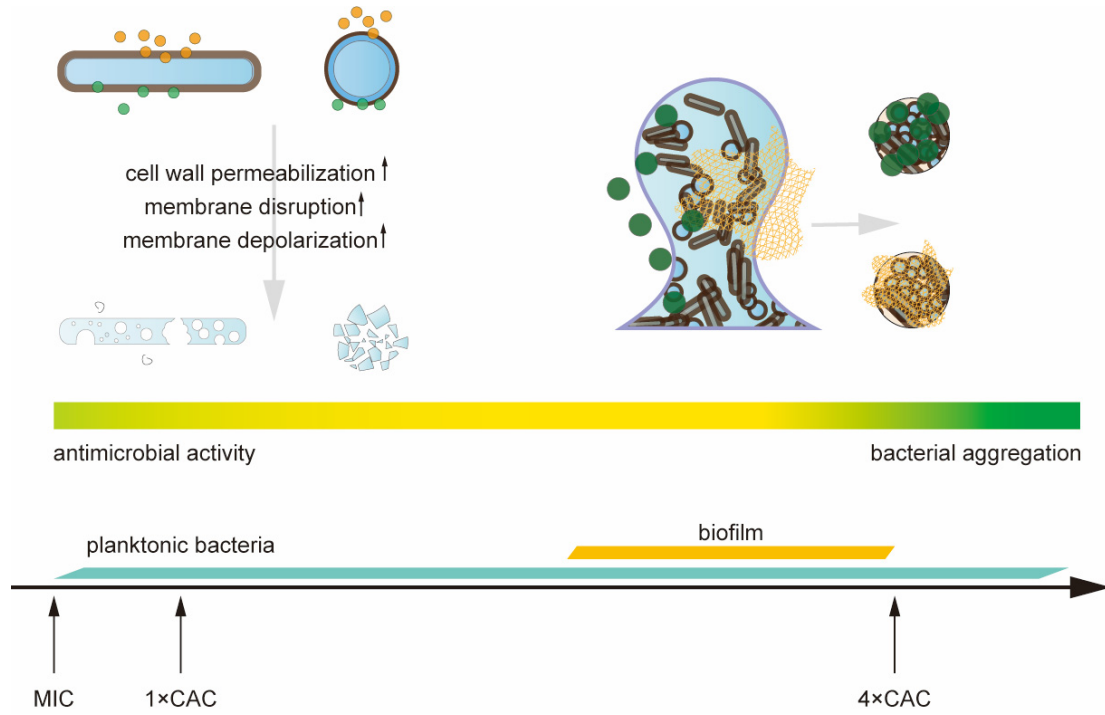

fig. S10 The model of the relationship of antimicrobial activity and bacterial aggregation.

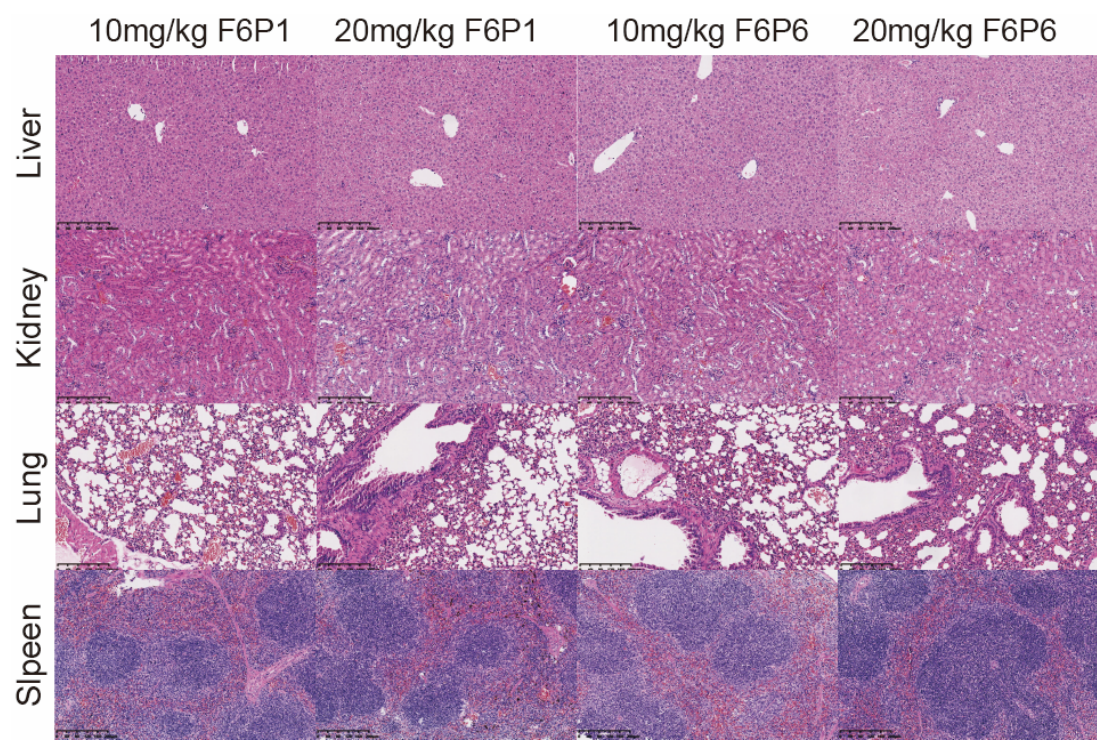

fig. S11 **Histopathological morphology analysis in mice following administration of 10 or 20 mg/kg HAMPs for 5 days.** Scale bar, 200  $\mu$ m.

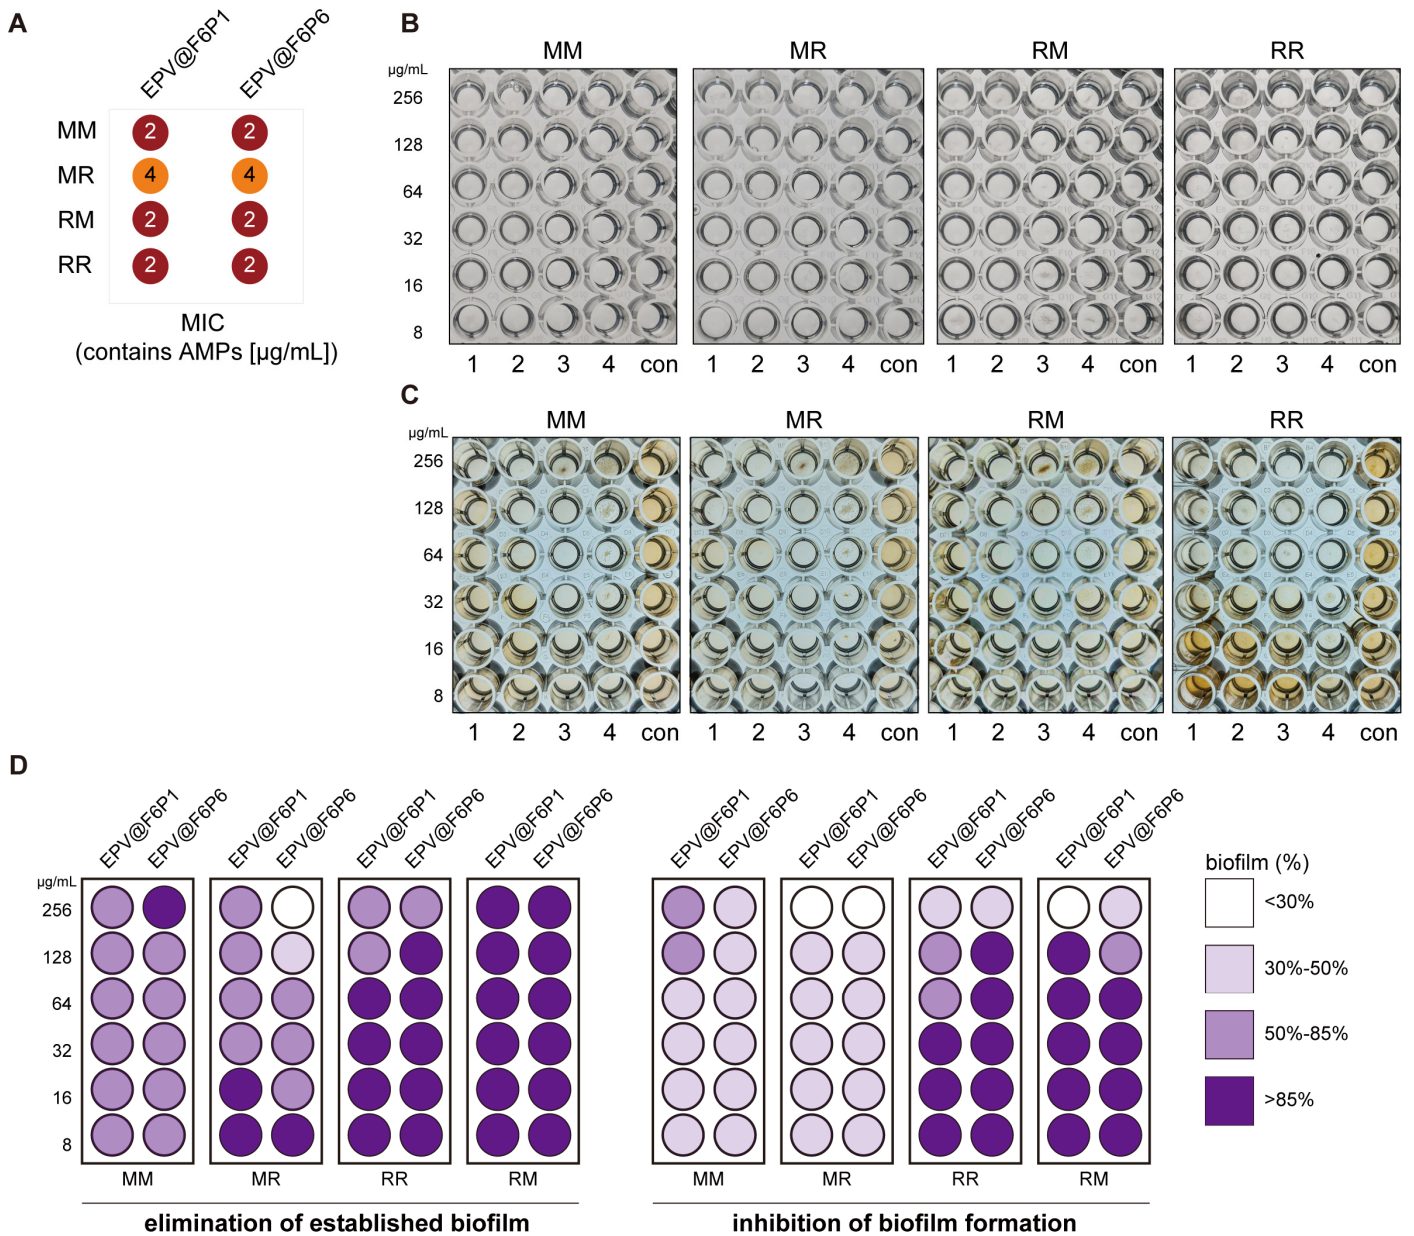

fig. S12 EPV@HAMPs against *C. perfringens* under four conditions. (A) MIC assays. (B) Bacterial agglutination was observed in the antibiofilm assays. (C) XTT assays for visualization of biofilm viability. The first to fourth columns represent F6P1, F6P6, EPV@F6P1, and EPV@F6P6, respectively. Bacterial aggregation can be observed in the wells. (D) Cleaning of biofilm (left) and inhibition of biofilm formation (right) by EPV@HAMPs under four conditions (n=3 biological replicates).



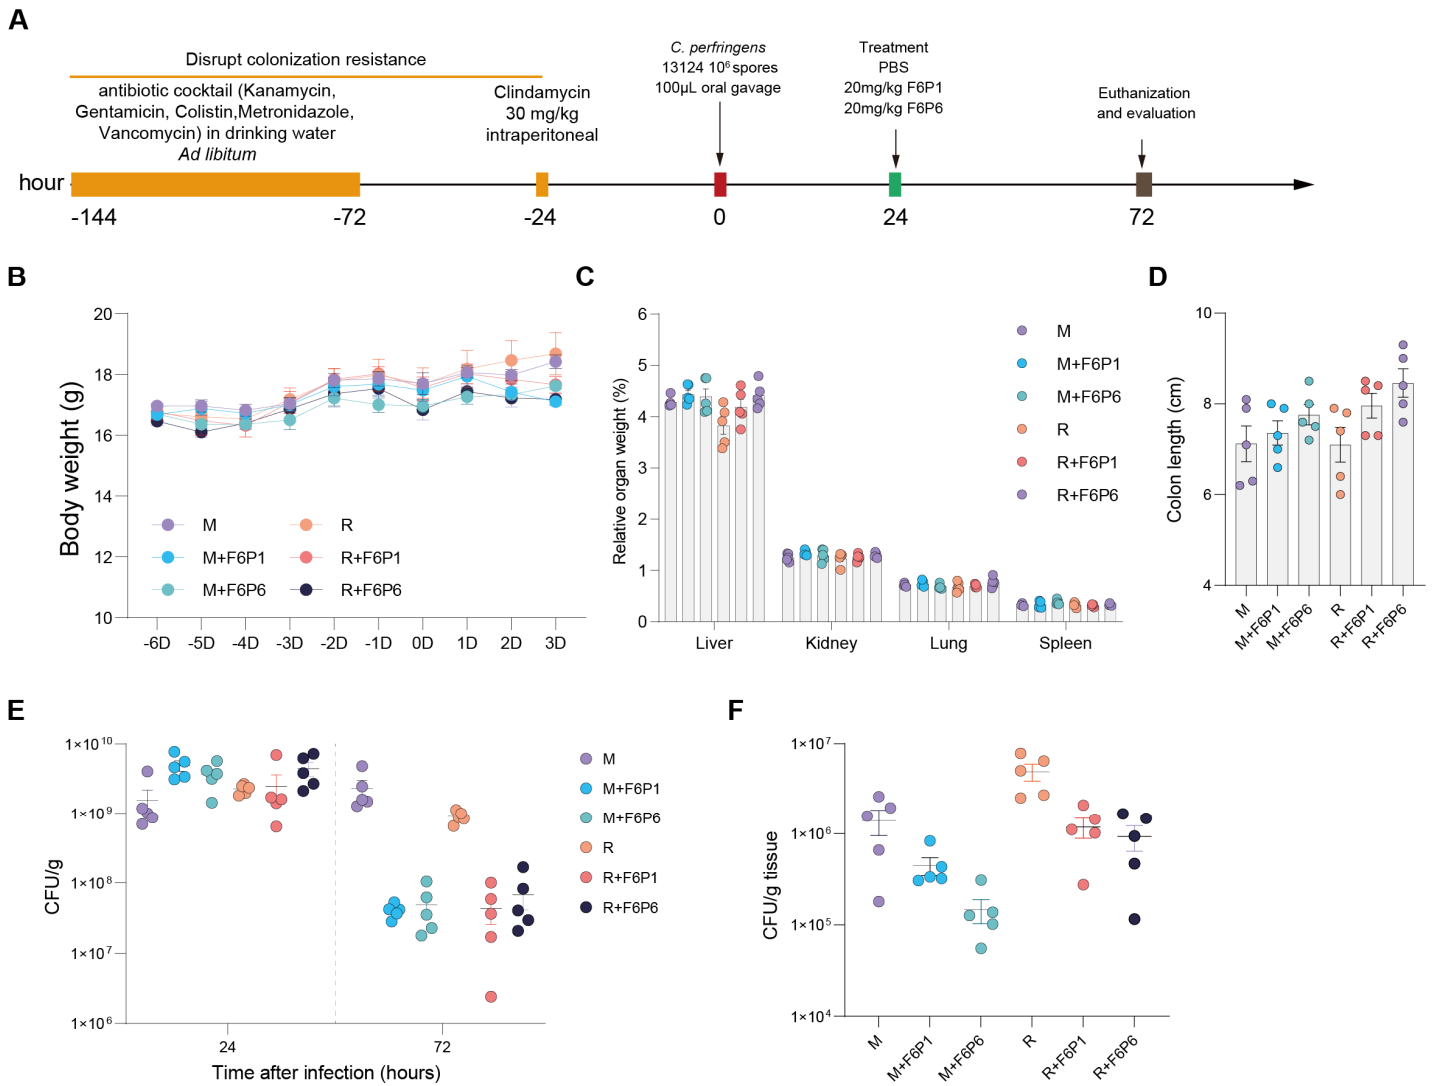

fig. S13 *In vivo* activity test of HMAPs against *C. perfringens* cultured in RCM or MHB. (A) Experimental design for CPI and treatment. (B to D) Body weight, relative organ weight, and colon length of mice. The initial inoculum of bacteria was  $\sim 10^6$  CFU. Data are presented as the mean  $\pm$  SEM;  $n = 5$  mice per group. (E and F) Bacterial load of *C. perfringens* in feces (E) and colon tissues (F) of infected mice.

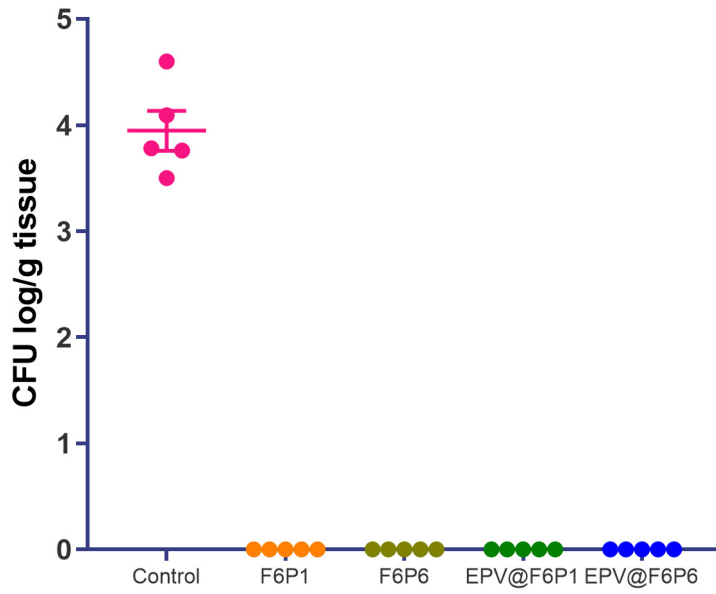

fig. S14 *C. perfringens* load in liver. Each sample for which *C. perfringens* was not detected, which was measured in triplicate. Values are the mean  $\pm$  SEM, n = 5.

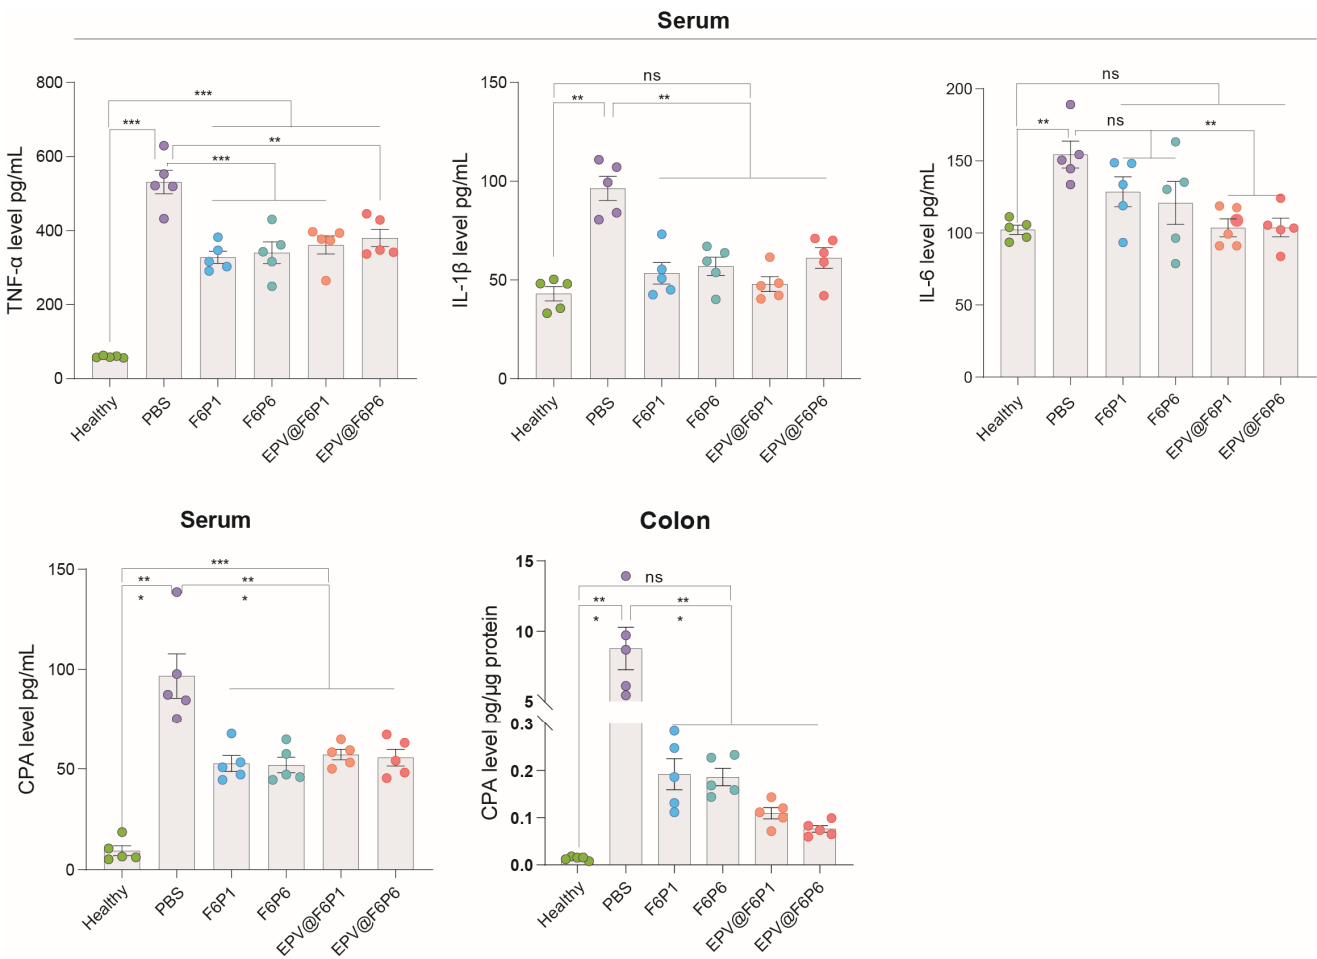

fig. S15 The levels of TNF- $\alpha$ , IL-1 $\beta$ , IL-6, and CPA toxin of serum or colon in healthy and CPI mice treated with PBS and HAMPs and EPV@HAMPs. Data are presented as the mean  $\pm$  SEM; n = 5 mice per group. The differences between the groups were determined using one-way ANOVA followed by Tukey's post hoc analysis. \* $p < 0.05$ , \*\* $p < 0.01$ , \*\*\* $p < 0.001$ .

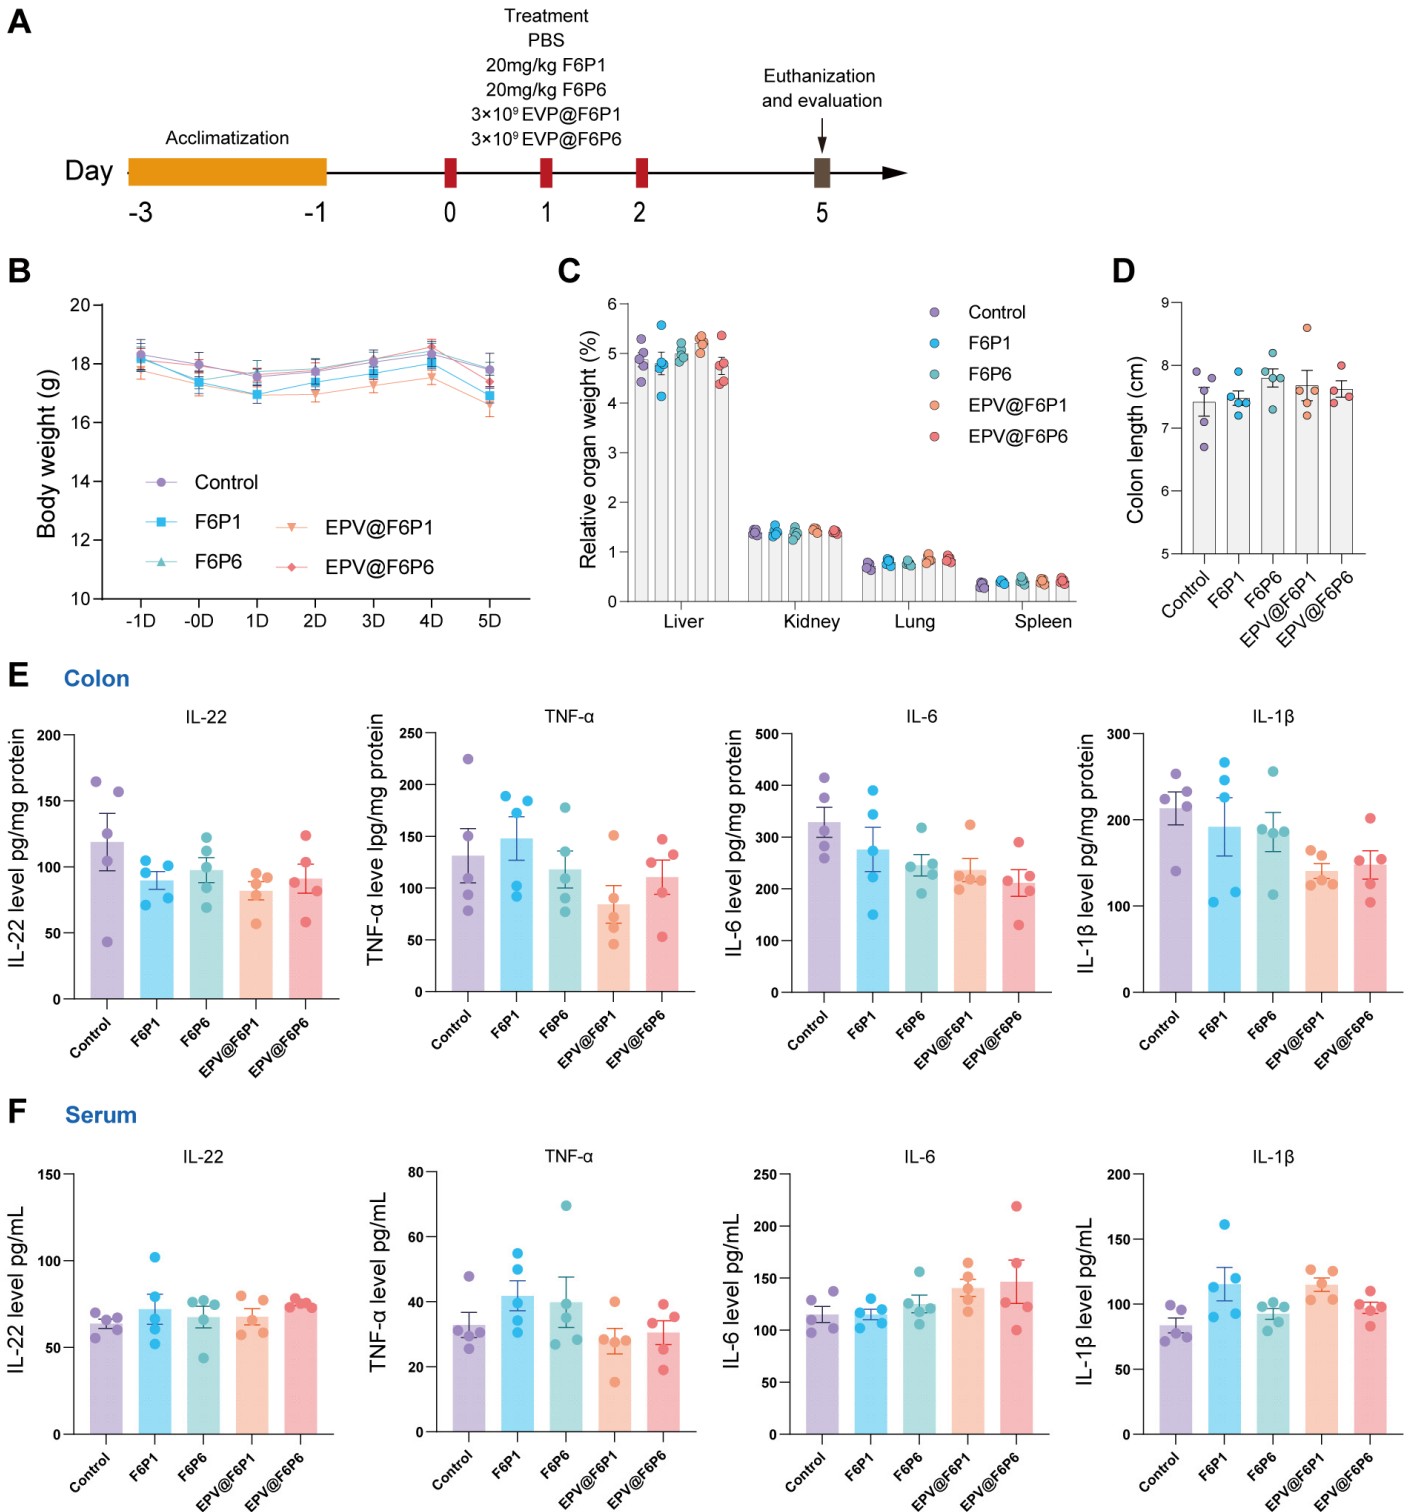

fig. S16 **HAMPs and EPV@HAMPs have no effect on colon length and serum inflammatory cytokine levels in healthy mice.** (A) Experimental design. (B to D) Body weight, colon length, and relative organ weight of mice. Data are presented as the mean  $\pm$  SEM;  $n = 5$  mice per group. (E to F) Effects of HAMPs and EPV@HAMPs on the levels of inflammatory cytokine in mice colon (E) and serum (F).

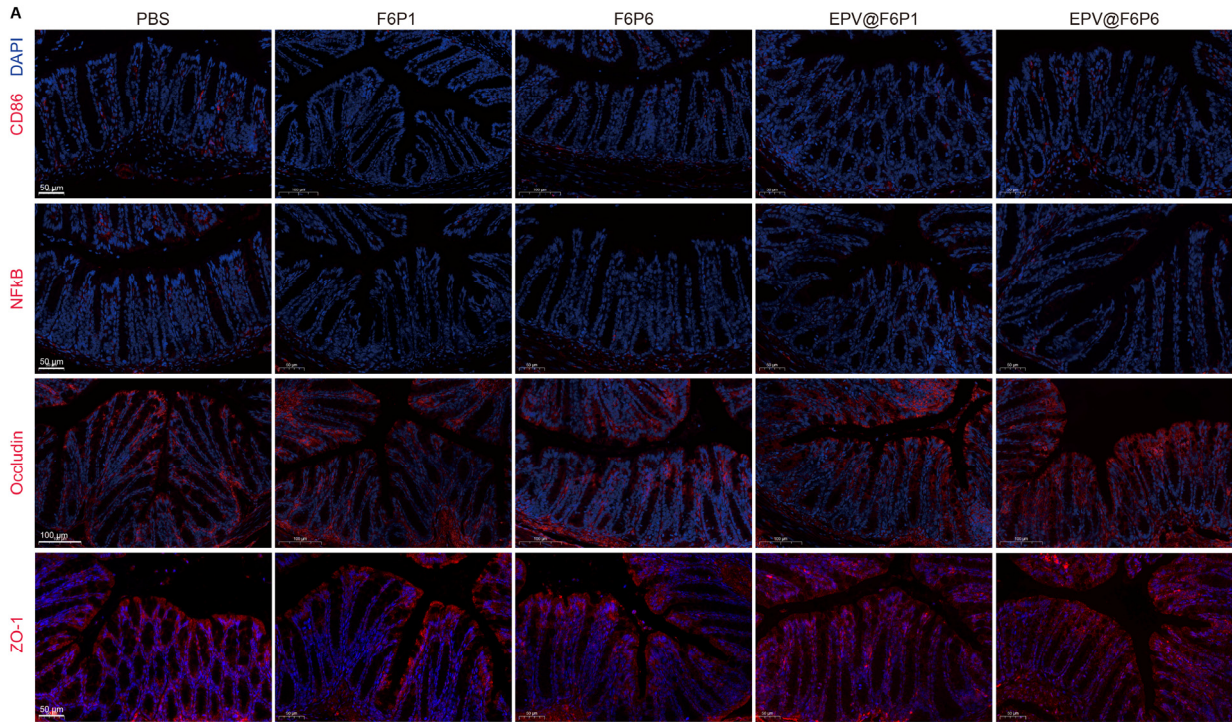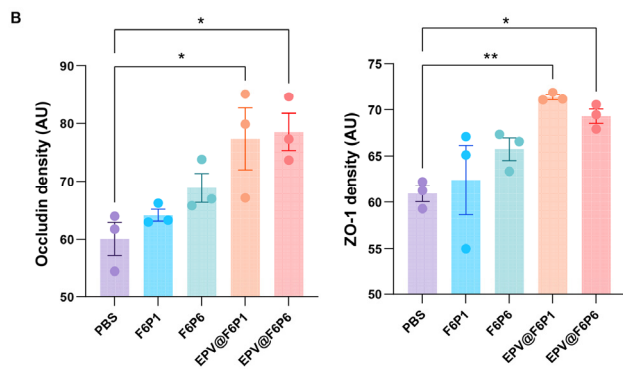

fig. S17 **Immunofluorescence analysis on the colon tissues.** (A) Immunofluorescence for CD86, NFκB, Occludin, and ZO-1 was performed in frozen colon sections from healthy mice treated by PBS, HAMPs and EPV@HAMPs for five days. The PBS treatment group was used as control. Scale bar, 50 or 100 μm. (B) The semi-quantitative analysis of immunofluorescence staining of Occludin and ZO-1. Data are presented as the mean ± SEM; n = 3. The differences between the groups were determined using one-way ANOVA followed by Tukey's post hoc analysis. \* $p < 0.05$ , \*\* $p < 0.01$ .

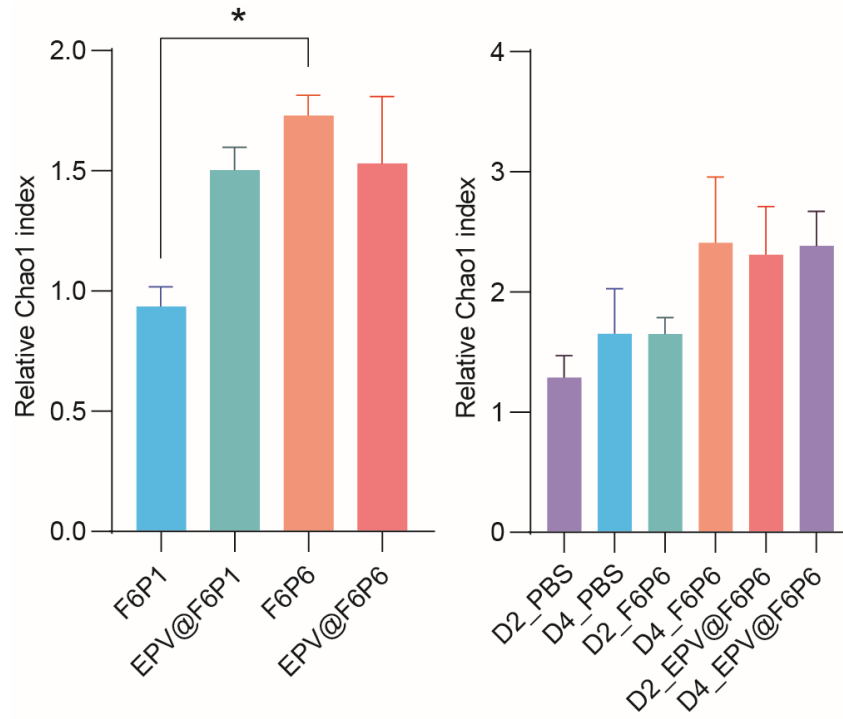

fig. S18 **Relative Chao1 index of observed operational taxonomic units showed the  $\alpha$ -diversity of the microbial community.** Relative Chao1 index was adjusted by D1's fecal bacteria chao1 index.

A

Community heatmap analysis (family)

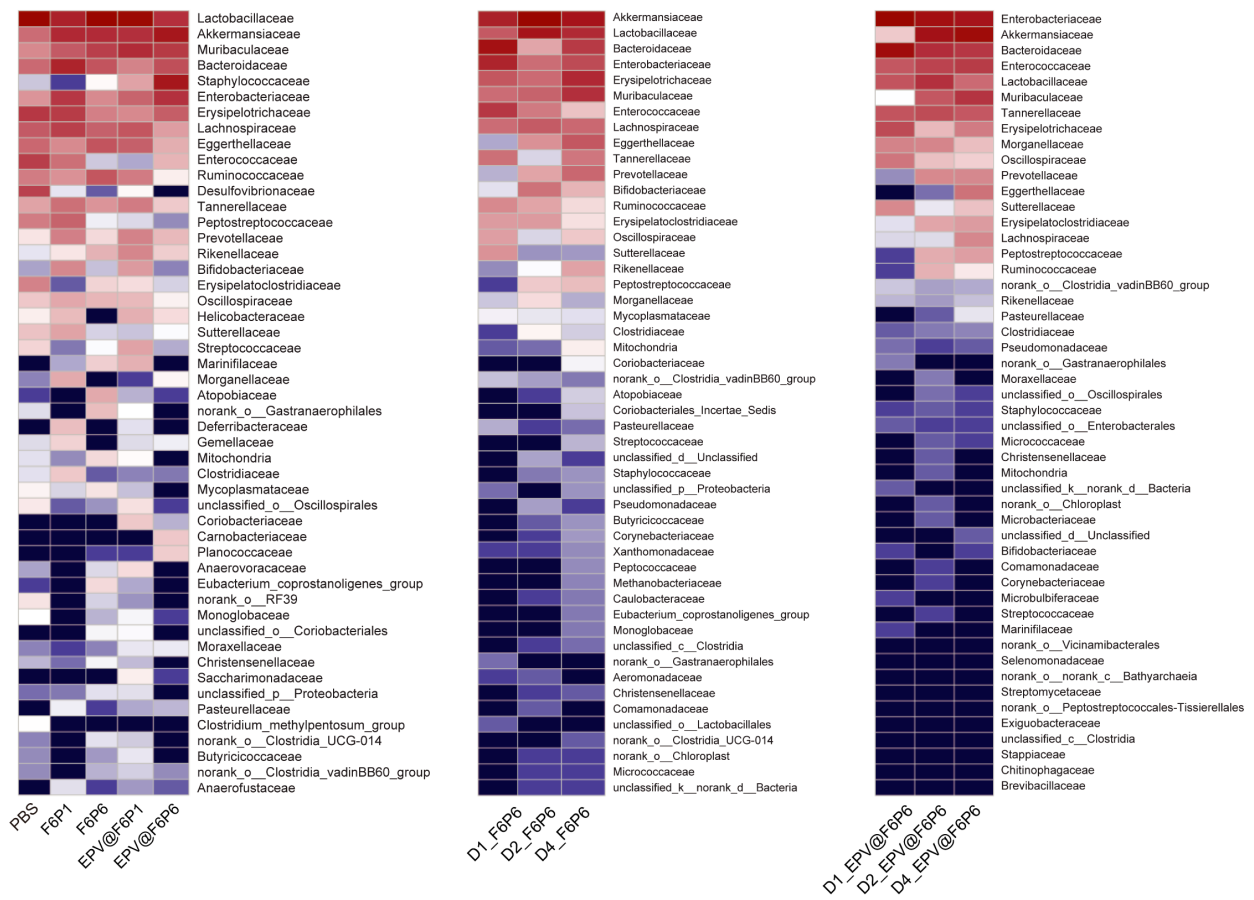

B

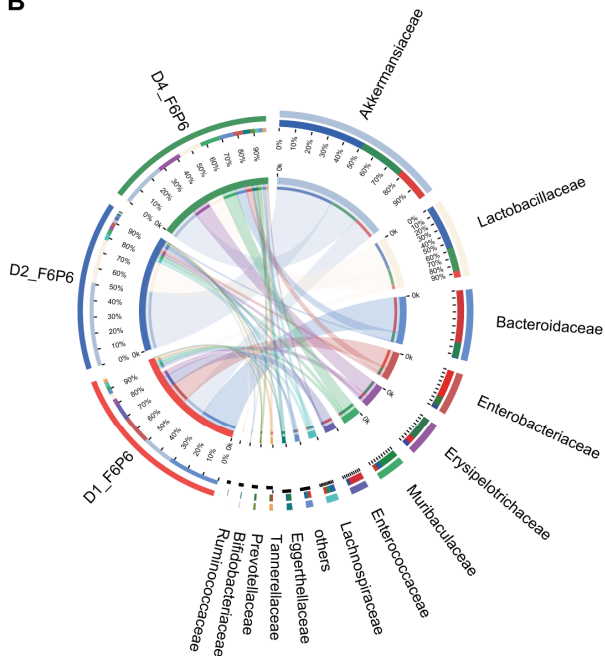

C

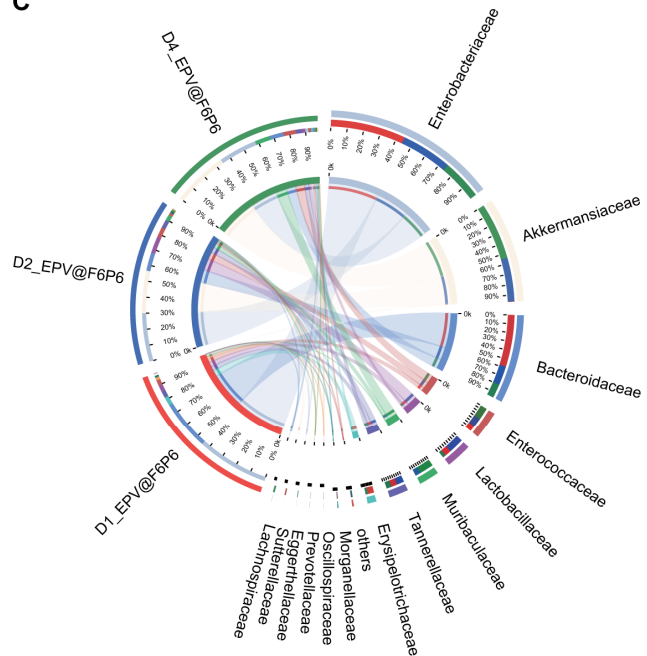

fig. S19 Heatmap and Circos plots. (A) Heatmap showing the relative abundance of microbial compositional profiling at the family level. (B and C) Circos plots of the corresponding abundance relationship between samples and bacterial communities at the family level.

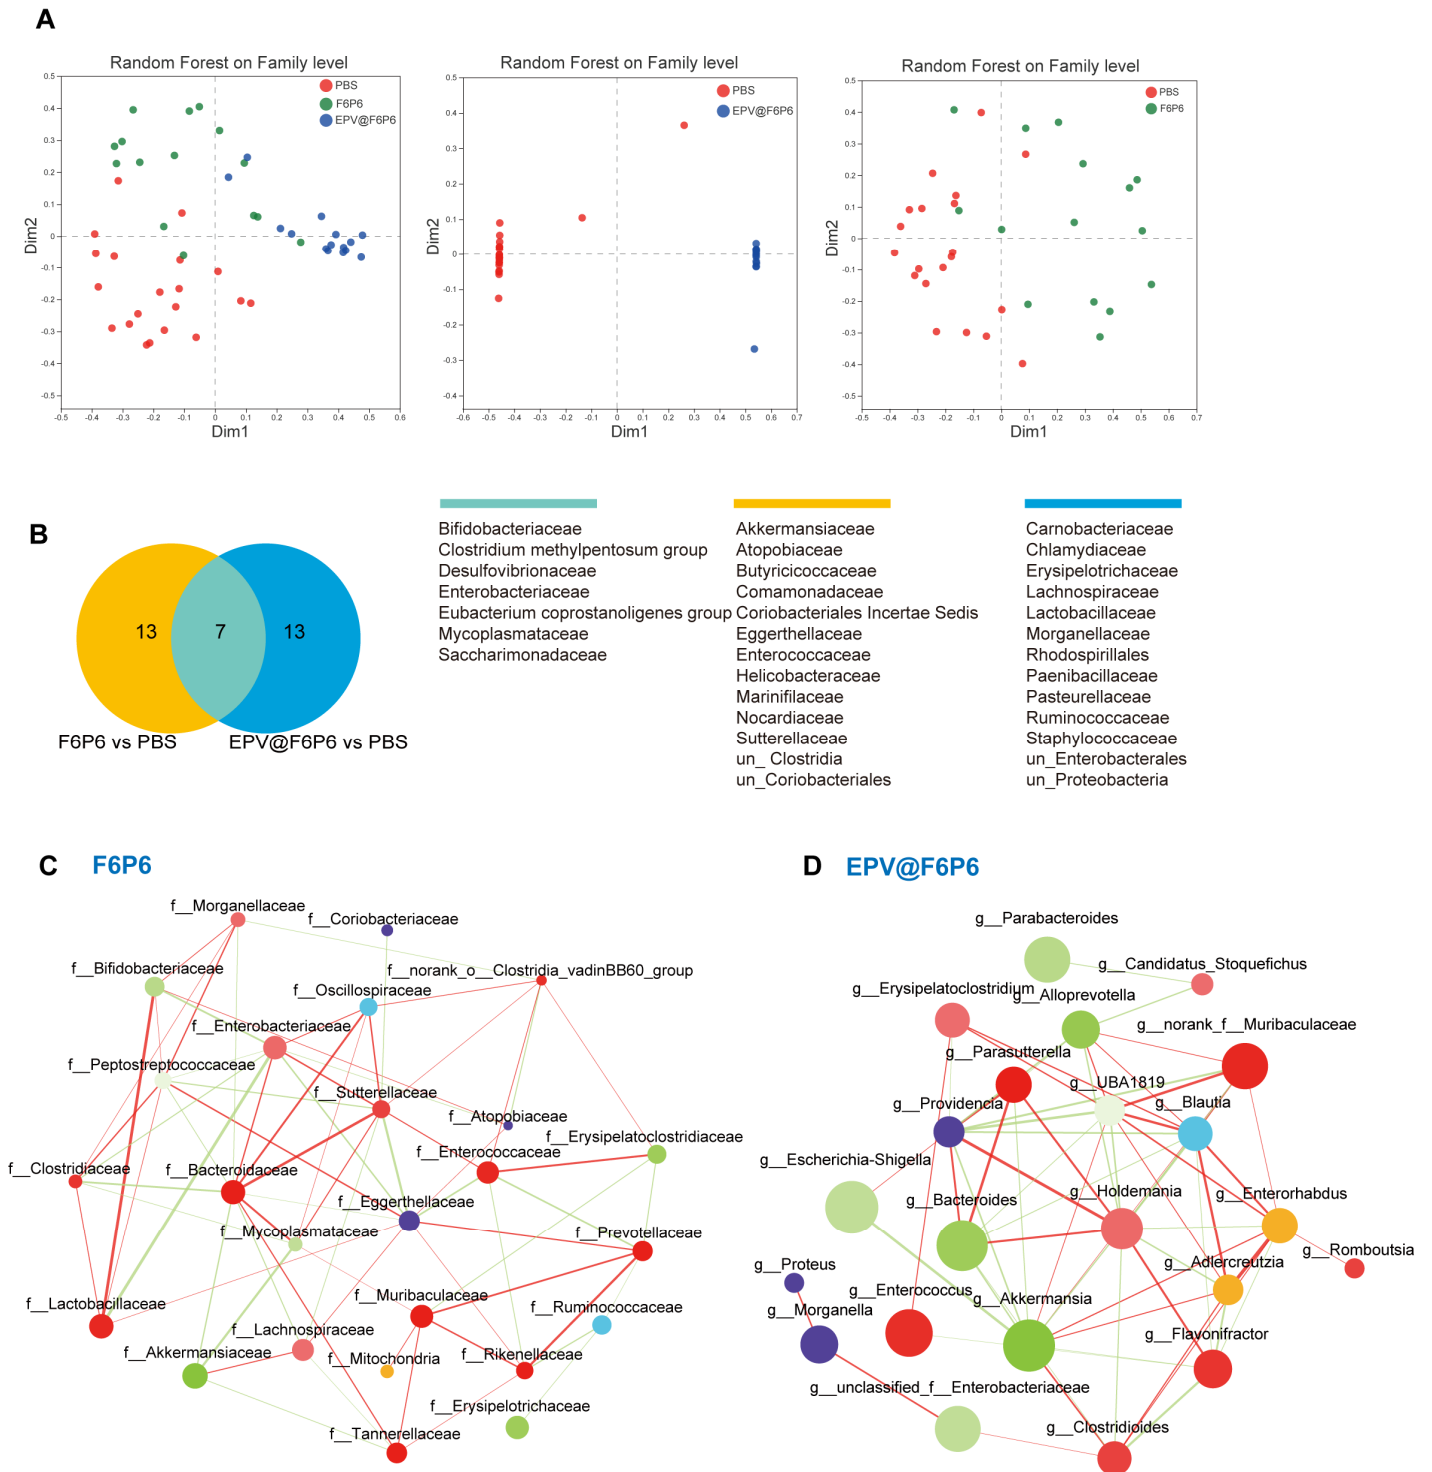

fig. S20 16S rRNA sequencing analysis of microbiota regulated by F6P6 and EPV@F6P6. (A) Random forest analysis on family level. Each point represents each mouse. (B) Venn diagram of F6P6 vs Control and EPV@F6P6 vs Control and their important bacteria. (C and D) Related networks of F6P6 and EPV@F6P6. In analysis of the figure, the "PBS" group represents all fecal and colonic content samples (n=20) with treatment of PBS; the "F6P6" group represents all fecal and colonic content samples (n=15) with treatment of F6P6; the "EPV@F6P6" group represents all fecal and colonic content samples (n=15) with treatment of EPV@F6P6.



**A**

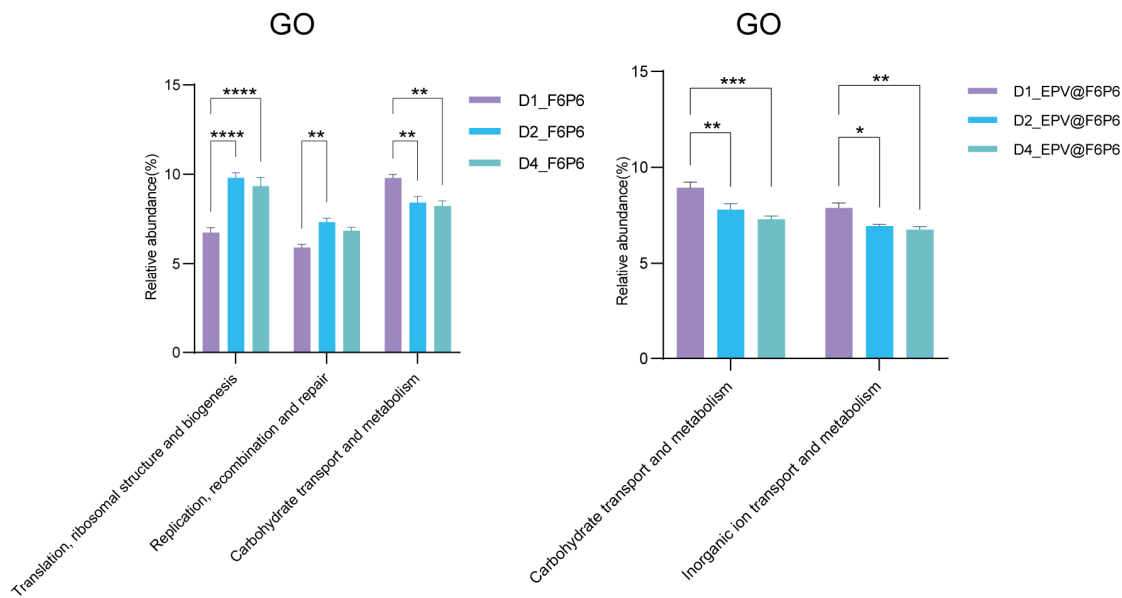

**B**

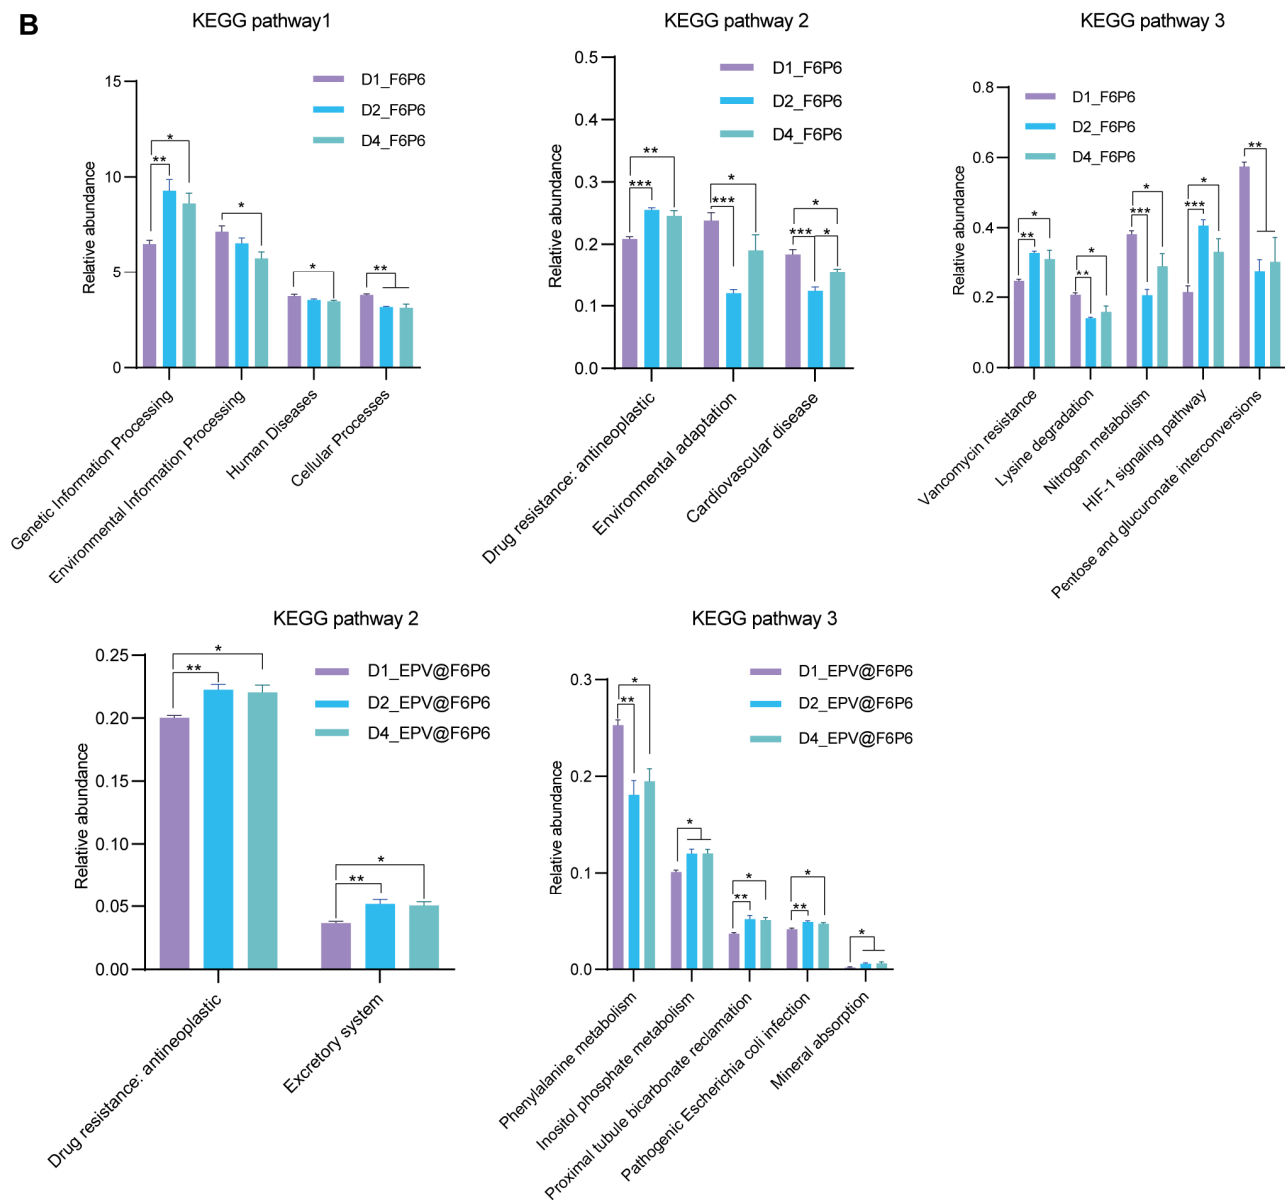

fig. S21 **The GO and KEGG analysis of microbiota functions for F6P6 and EPV@F6P6.** D1, D2, and D4 represent the fecal samples collected after 0, 1, and 2 administrations of F6P6 or EPV@F6P6, respectively. The Kruskal–Wallis test was applied for statistical analysis. \*  $p < 0.05$ , \*\*  $p < 0.01$ , \*\*\*  $p < 0.001$ .

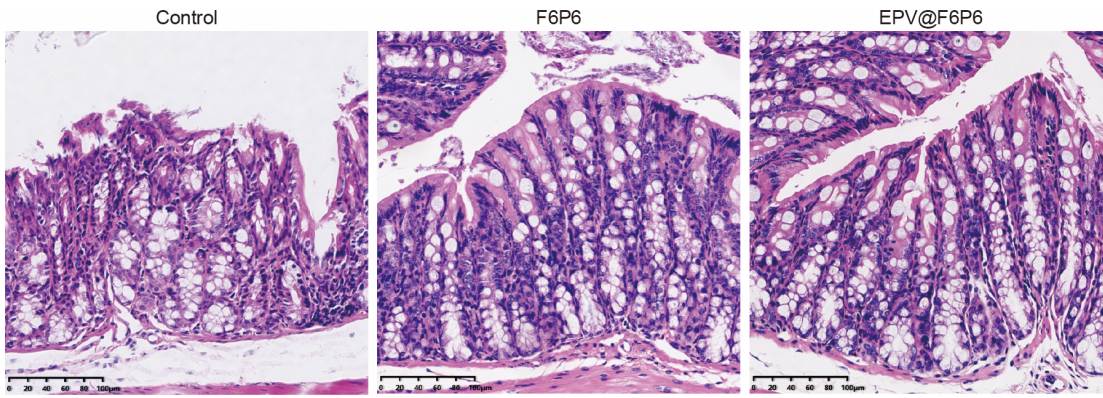

fig. S22 Histopathological H&E staining of colon tissues of persistent CPI. Scale bar, 100 µm.

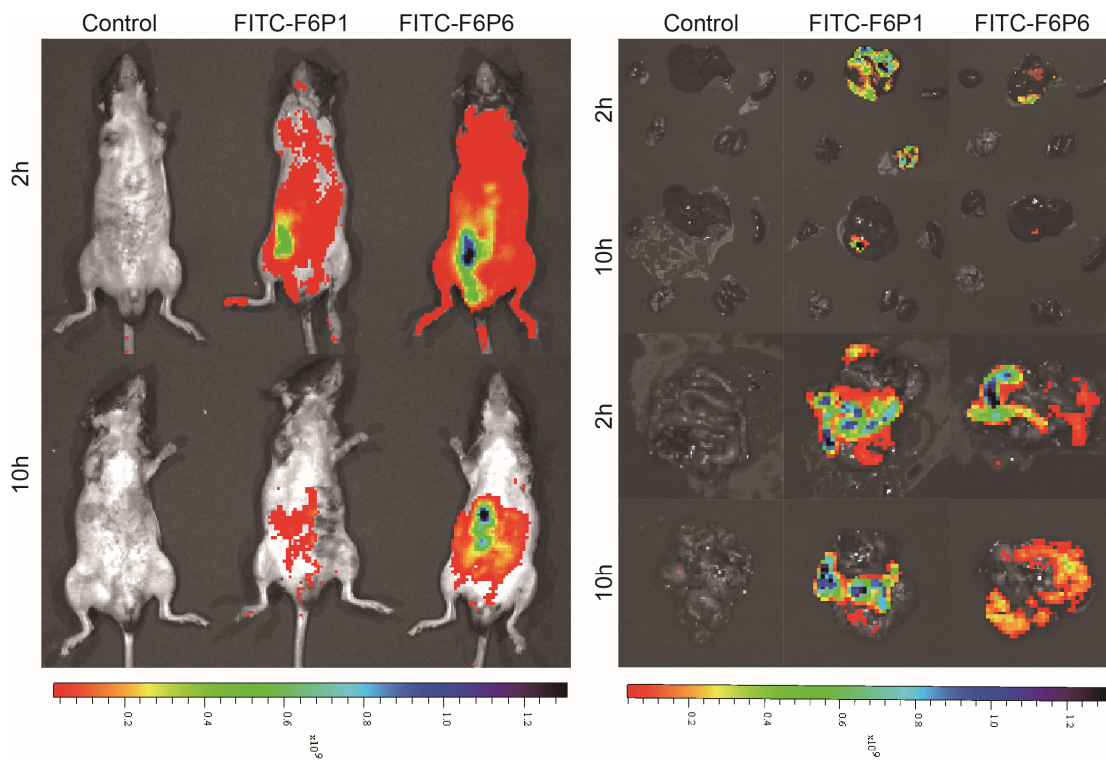

fig. S23 Mice and organs were imaged by *in vivo* imaging system at 2h or 10h after I.P. 20mg/kg FITC-HAMPs. The intestine with strong signals compared with other organs.

table S1 Performance of machine learning models

| Order | model                   | roc_auc_ovo_macro | accuracy | f1_macro | f1_micro | precision_macro | precision_micro | recall_macro | recall_micro |
|-------|-------------------------|-------------------|----------|----------|----------|-----------------|-----------------|--------------|--------------|
| 1     | WeightedEnsemble_L3     | 0.912             | 0.768    | 0.764    | 0.768    | 0.764           | 0.768           | 0.765        | 0.768        |
| 2     | LightGBMXT_BAG_L2       | 0.912             | 0.768    | 0.764    | 0.768    | 0.764           | 0.768           | 0.765        | 0.768        |
| 3     | XGBoost_BAG_L2          | 0.911             | 0.780    | 0.776    | 0.780    | 0.776           | 0.780           | 0.777        | 0.780        |
| 4     | LightGBM_BAG_L2         | 0.909             | 0.773    | 0.768    | 0.773    | 0.768           | 0.773           | 0.769        | 0.773        |
| 5     | CatBoost_BAG_L2         | 0.907             | 0.761    | 0.757    | 0.761    | 0.757           | 0.761           | 0.758        | 0.761        |
| 6     | RandomForestEntr_BAG_L2 | 0.905             | 0.749    | 0.744    | 0.749    | 0.744           | 0.749           | 0.745        | 0.749        |
| 7     | ExtraTreesEntr_BAG_L2   | 0.905             | 0.768    | 0.764    | 0.768    | 0.764           | 0.768           | 0.764        | 0.768        |
| 8     | RandomForestGini_BAG_L2 | 0.903             | 0.763    | 0.759    | 0.763    | 0.760           | 0.763           | 0.760        | 0.763        |
| 9     | NeuralNetFastAI_BAG_L2  | 0.903             | 0.761    | 0.756    | 0.761    | 0.757           | 0.761           | 0.757        | 0.761        |
| 10    | ExtraTreesGini_BAG_L2   | 0.903             | 0.756    | 0.752    | 0.756    | 0.752           | 0.756           | 0.753        | 0.756        |
| 11    | NeuralNetTorch_BAG_L2   | 0.902             | 0.756    | 0.751    | 0.756    | 0.752           | 0.756           | 0.752        | 0.756        |
| 12    | LightGBMLarge_BAG_L2    | 0.902             | 0.768    | 0.763    | 0.768    | 0.763           | 0.768           | 0.764        | 0.768        |
| 13    | ExtraTreesEntr_BAG_L1   | 0.895             | 0.742    | 0.736    | 0.742    | 0.738           | 0.742           | 0.738        | 0.742        |
| 14    | LightGBMXT_BAG_L1       | 0.889             | 0.731    | 0.724    | 0.731    | 0.726           | 0.731           | 0.726        | 0.731        |
| 15    | WeightedEnsemble_L2     | 0.889             | 0.731    | 0.724    | 0.731    | 0.726           | 0.731           | 0.726        | 0.731        |
| 16    | ExtraTreesGini_BAG_L1   | 0.887             | 0.724    | 0.716    | 0.724    | 0.719           | 0.724           | 0.718        | 0.724        |
| 17    | LightGBM_BAG_L1         | 0.886             | 0.726    | 0.720    | 0.726    | 0.721           | 0.726           | 0.721        | 0.726        |
| 18    | RandomForestEntr_BAG_L1 | 0.882             | 0.717    | 0.708    | 0.717    | 0.711           | 0.717           | 0.711        | 0.717        |
| 19    | XGBoost_BAG_L1          | 0.881             | 0.714    | 0.708    | 0.714    | 0.709           | 0.714           | 0.710        | 0.714        |
| 20    | CatBoost_BAG_L1         | 0.881             | 0.731    | 0.725    | 0.731    | 0.727           | 0.731           | 0.726        | 0.731        |
| 21    | RandomForestGini_BAG_L1 | 0.880             | 0.707    | 0.699    | 0.707    | 0.701           | 0.707           | 0.702        | 0.707        |
| 22    | NeuralNetFastAI_BAG_L1  | 0.879             | 0.738    | 0.735    | 0.738    | 0.735           | 0.738           | 0.735        | 0.738        |
| 23    | LightGBMLarge_BAG_L1    | 0.877             | 0.705    | 0.698    | 0.705    | 0.698           | 0.705           | 0.699        | 0.705        |
| 24    | NeuralNetTorch_BAG_L1   | 0.873             | 0.719    | 0.714    | 0.719    | 0.714           | 0.719           | 0.715        | 0.719        |
| 25    | KNeighborsDist_BAG_L1   | 0.860             | 0.717    | 0.709    | 0.717    | 0.716           | 0.717           | 0.713        | 0.717        |
| 26    | KNeighborsUnif_BAG_L1   | 0.821             | 0.646    | 0.643    | 0.646    | 0.646           | 0.646           | 0.645        | 0.646        |

table S2 The importance of features

| Features                                    | importance | P value | Features                           | importance | P value |
|---------------------------------------------|------------|---------|------------------------------------|------------|---------|
| Tilt Angle                                  | 0.046      | 0.000   | Z5                                 | 0.001      | 0.251   |
| Angle Subtended by the Hydrophobic Residues | 0.023      | 0.005   | Small_Mole.                        | 0.001      | 0.213   |
| Propensity to in vitro Aggregation          | 0.016      | 0.003   | VHSE2                              | 0.001      | 0.152   |
| Net Charge                                  | 0.012      | 0.030   | T3                                 | 0.001      | 0.104   |
| Length                                      | 0.010      | 0.005   | T1                                 | 0.001      | 0.152   |
| BLOSUM10                                    | 0.010      | 0.003   | Isoelectric Point                  | 0.001      | 0.341   |
| Basic_Mole.                                 | 0.010      | 0.009   | Boman Index                        | 0.001      | 0.213   |
| ProtFP7                                     | 0.009      | 0.012   | F1                                 | 0.001      | 0.311   |
| KF9                                         | 0.007      | 0.008   | BLOSUM4                            | 0.001      | 0.213   |
| Aromatic_Mole.                              | 0.007      | 0.025   | ST6                                | 0.001      | 0.187   |
| Charged_Mole.                               | 0.007      | 0.112   | BLOSUM8                            | 0.001      | 0.271   |
| Hp                                          | 0.007      | 0.032   | MSWHIM3                            | 0.001      | 0.294   |
| KF3                                         | 0.007      | 0.001   | T4                                 | 0.001      | 0.294   |
| Ep                                          | 0.007      | 0.060   | F3                                 | 0.001      | 0.238   |
| VHSE8                                       | 0.007      | 0.016   | VHSE1                              | 0.001      | 0.187   |
| KF10                                        | 0.007      | 0.004   | Aliphatic_Mole.                    | 0.000      | 0.433   |
| MSWHIM2                                     | 0.006      | 0.013   | Disordered Conformation Propensity | 0.000      | 0.389   |
| BLOSUM7                                     | 0.006      | 0.050   | PP2                                | 0.000      | 0.311   |
| KF4                                         | 0.005      | 0.095   | BLOSUM5                            | 0.000      | 0.436   |
| Amphiphilicity Index                        | 0.005      | 0.006   | Hydrophobic residue%               | 0.000      | 0.399   |
| PP3                                         | 0.005      | 0.051   | Propensity to PPII coil            | 0.000      | 0.500   |
| ST1                                         | 0.004      | 0.027   | BLOSUM9                            | 0.000      | 0.500   |
| KF5                                         | 0.004      | 0.128   | miuH                               | 0.000      | 0.500   |
| BLOSUM3                                     | 0.004      | 0.080   | BLOSUM6                            | 0.000      | 0.500   |
| MSWHIM1                                     | 0.004      | 0.008   | Acidic_Mole.                       | 0.000      | 0.500   |
| KF6                                         | 0.003      | 0.012   | Z2                                 | 0.000      | 0.500   |
| ST5                                         | 0.003      | 0.054   | VHSE7                              | 0.000      | 0.500   |
| F6                                          | 0.003      | 0.080   | KF7                                | 0.000      | 0.500   |
| Normalized Hydrophobic Moment               | 0.003      | 0.067   | ST4                                | 0.000      | 0.500   |
| F2                                          | 0.003      | 0.026   | ProtFP4                            | 0.000      | 0.500   |
| ST8                                         | 0.003      | 0.016   | Z1                                 | 0.000      | 0.500   |
| Tiny_Mole.                                  | 0.003      | 0.274   | Z4                                 | 0.000      | 0.586   |
| VHSE5                                       | 0.003      | 0.072   | H                                  | 0.000      | 0.586   |
| ProtFP3                                     | 0.002      | 0.045   | ST7                                | 0.000      | 0.626   |
| F5                                          | 0.002      | 0.243   | ST2                                | 0.000      | 0.611   |
| Z3                                          | 0.002      | 0.017   | KF1                                | -0.001     | 0.676   |
| ProtFP6                                     | 0.002      | 0.187   | ProtFP2                            | -0.001     | 0.813   |
| VHSE3                                       | 0.002      | 0.017   | F4                                 | -0.001     | 0.813   |
| NonPolar_Mole.                              | 0.002      | 0.149   | PP1                                | -0.002     | 0.950   |
| Penetration Depth                           | 0.002      | 0.071   | VHSE6                              | -0.002     | 0.911   |
| ST3                                         | 0.002      | 0.197   | Normalized Hydrophobicity          | -0.002     | 0.879   |
| T2                                          | 0.002      | 0.115   | BLOSUM1                            | -0.002     | 0.813   |
| ProtFP1                                     | 0.002      | 0.121   | BLOSUM2                            | -0.002     | 0.955   |
| Polar_Mole.                                 | 0.002      | 0.121   | KF2                                | -0.002     | 0.885   |
| VHSE4                                       | 0.002      | 0.121   | ProtFP5                            | -0.003     | 0.998   |
| T5                                          | 0.002      | 0.050   | ProtFP8                            | -0.005     | 0.990   |
| KF8                                         | 0.002      | 0.008   | Linear Moment                      | -0.007     | 0.997   |

table S3 The parameters of MLamPs

| ID     | Sequence      | Length | Hydrophobic residue% | Helix (%) | <H>   | < $\mu$ H> | Normalized Hydrophobic Moment | Normalized Hydrophobicity | Net Charge | Isoelectric Point | Penetration Depth | Tilt Angle | Disordered Conformation Propensity | Linear Moment | Propensity to in vitro Aggregation | Angle Subtended by the Hydrophobic Residues | Amphiphilicity Index | Propensity to PPII coil |
|--------|---------------|--------|----------------------|-----------|-------|------------|-------------------------------|---------------------------|------------|-------------------|-------------------|------------|------------------------------------|---------------|------------------------------------|---------------------------------------------|----------------------|-------------------------|
| MLamP1 | KLKLLLGLLLKK  | 13     | 53.85%               | 84.62%    | 0.535 | 0.310      | 0.83                          | -0.52                     | 5          | 11.27             | 14                | 94         | 0.02                               | 0.43          | 282.39                             | 80                                          | 1.41                 | 0.81                    |
| MLamP2 | KLLKLLKLLGLLK | 13     | 53.85%               | 84.62%    | 0.535 | 0.324      | 0.79                          | -0.52                     | 5          | 11.27             | 14                | 95         | 0.02                               | 0.29          | 33.90                              | 100                                         | 1.41                 | 0.81                    |
| MLamP3 | KKLLLKGLLLKK  | 13     | 53.85%               | 92.31%    | 0.535 | 0.337      | 1.09                          | -0.52                     | 5          | 11.27             | 14                | 94         | 0.02                               | 0.42          | 14.06                              | 90                                          | 1.41                 | 0.81                    |
| MLamP4 | KKLLGLLKLKKL  | 13     | 53.85%               | 84.62%    | 0.535 | 0.338      | 1.07                          | -0.52                     | 5          | 11.27             | 14                | 91         | 0.02                               | 0.38          | 26.63                              | 100                                         | 1.41                 | 0.81                    |
| MLamP5 | LKKLGLLLKKKLL | 13     | 53.85%               | 84.62%    | 0.535 | 0.354      | 1.02                          | -0.52                     | 5          | 11.28             | 14                | 95         | 0.02                               | 0.33          | 1.87                               | 100                                         | 1.41                 | 0.81                    |
| MLamP6 | KKLLGLLLKLKLL | 13     | 53.85%               | 84.62%    | 0.535 | 0.365      | 1.10                          | -0.52                     | 5          | 11.27             | 14                | 94         | 0.02                               | 0.39          | 25.52                              | 130                                         | 1.41                 | 0.81                    |

Physicochemical properties of peptides were calculated by DBAASP.

table S4 In vitro biocompatibility of MLamPs ( $\mu\text{g/mL}$ )

| Peptides | HL <sub>10</sub> | CSI (hRBCs) | CT <sub>10</sub> | CSI (HEK293 cells) |
|----------|------------------|-------------|------------------|--------------------|
| MLamP1   | 256              | 2           | >256             | 4                  |
| MLamP2   | >256             | 32          | 256              | 16                 |
| MLamP3   | >256             | 128         | 256              | 64                 |
| MLamP4   | >256             | 8           | 256              | 4                  |
| MLamP5   | >256             | 4           | 256              | 2                  |
| MLamP6   | >256             | 2           | 256              | 1                  |

HL<sub>10</sub>: lowest AMPs concentration that induces 10% hemolysis. CT<sub>10</sub>: lowest AMPs concentration that causes 10% cell death. CSI: cell selectivity index = HL<sub>10</sub>/MIC or CT<sub>10</sub>/MIC. Each test was performed on three independent experiments.

table S5  $\alpha$ -Helical and  $\beta$ -sheet content of AMPs

|           | MLamP1   |         |          | MLamP6   |         |          |
|-----------|----------|---------|----------|----------|---------|----------|
|           | 10mM PBS | 50% TFE | 30mM SDS | 10mM PBS | 50% TFE | 30mM SDS |
| Helix (%) | 3.78%    | 39.65%  | 60.27%   | 5.51%    | 46.02%  | 46.90%   |
| Beta (%)  | 36.24%   | 6.70%   | 1.82%    | 9.38%    | 4.62%   | 3.26%    |

The secondary structure content of the peptides was estimated using K2D3.

table S6 ELISA-based analysis of the binding of 12-residue peptides to the tested microorganisms and sequence of targeting peptides

| ID  | <i>C. perfringens</i><br>OD <sub>450</sub> | <i>S. flexneri</i><br>OD <sub>450</sub> | <i>E. coli</i> O157:H7<br>OD <sub>450</sub> | <i>S. typhimurium</i><br>OD <sub>450</sub> | Sequence     |
|-----|--------------------------------------------|-----------------------------------------|---------------------------------------------|--------------------------------------------|--------------|
| G4  | 1.1849                                     | 0.4081                                  | 0.2767                                      | 0.4756                                     | TQGFTESHTQLF |
| A6  | 1.5053                                     | 0.0958                                  | 0.1037                                      | 0.1163                                     | WVRPLPLPSVHN |
| B1  | 0.3396                                     | 0.0527                                  | 0.0458                                      | 0.0556                                     | LNVCHNCVWQKT |
| D10 | 0.4911                                     | 0.0667                                  | 0.064                                       | 0.089                                      | GAVNGYYGHLIP |
| F6  | 4.016                                      | 0.2247                                  | 0.198                                       | 0.2573                                     | MSPSILKHWSRQ |
| A2  | 1.3862                                     | 0.3562                                  | 0.1808                                      | 0.7241                                     | FGVLLRGVLLR  |
| B3  | 1.012                                      | 0.1568                                  | 0.134                                       | 0.3106                                     | QSSMRFASPATL |
| B10 | 2.4652                                     | 0.1786                                  | 0.1675                                      | 0.1886                                     | LVPAPPHVHFPA |

All ELISA measurements were performed with an average of three technical replicates.

table S7 Proteins pulled down by biotin-F6

| Accession              | Names                                               | Length | Mass    | Subcellular locate   |
|------------------------|-----------------------------------------------------|--------|---------|----------------------|
| tr Q8XKT9 Q8XKT9_CLOPE | Glyceraldehyde-3-phosphate dehydrogenase            | 332    | 35362   | Cytoplasmic          |
| tr Q8XMK5 Q8XMK5_CLOPE | Amidophosphoribosyltransferase                      | 481    | 52724.8 | Cytoplasmic          |
| tr Q8XN32 Q8XN32_CLOPE | UTP--glucose-1-phosphate uridylyltransferase        | 306    | 34516.6 | Cytoplasmic          |
| tr Q8XL89 Q8XL89_CLOPE | Formate acetyltransferase                           | 744    | 83321.7 | Cytoplasmic          |
| tr Q8XP82 Q8XP82_CLOPE | Probable phosphoglycerate mutase                    | 207    | 24677.6 | Cytoplasmic          |
| sp Q8XI54 G6PI_CLOPE   | Glucose-6-phosphate isomerase                       | 450    | 49771   | Cytoplasmic          |
| sp Q8XKK2 CLPX_CLOPE   | ATP-dependent Clp protease ATP-binding subunit ClpX | 435    | 48177.8 | Cytoplasmic          |
| sp P26823 DNAK_CLOPE   | Chaperone protein DnaK OS=Clostridium perfringens   | 619    | 66481.2 | Cytoplasmic          |
| tr Q8XIV6 Q8XIV6_CLOPE | RNA polymerase sigma factor SigA                    | 373    | 42683.8 | Cytoplasmic          |
| sp P58693 SYN_CLOPE    | Asparagine--tRNA ligase                             | 465    | 53168.1 | Cytoplasmic          |
| sp Q8XID2 ATPA_CLOPE   | ATP synthase subunit alpha                          | 502    | 55265.2 | Cytoplasmic          |
| sp Q8XHT3 RL14_CLOPE   | 50S ribosomal protein L14                           | 122    | 13232.4 | Cytoplasmic          |
| tr Q8XKZ5 Q8XKZ5_CLOPE | Phosphatidylglycerol lysyltransferase               | 851    | 97828.9 | Cytoplasmic Membrane |

table S8 The parameters of HAMPs

| ID   | Sequence                    | Length | Hydrophobic residue% | <H>   | < $\mu$ H> | Normalized Hydrophobic Moment | Normalized Hydrophobicity | Net Charge | Isoelectric Point | Penetration Depth | Tilt Angle | Disordered Conformation Propensity | Linear Moment | Propensity to in vitro Aggregation | Angle Subtended by the Hydrophobic Residues | Amphiphilicity Index | Propensity to PPII coil |
|------|-----------------------------|--------|----------------------|-------|------------|-------------------------------|---------------------------|------------|-------------------|-------------------|------------|------------------------------------|---------------|------------------------------------|---------------------------------------------|----------------------|-------------------------|
| F6P1 | MSPSILKHWSRQGGGKLLKLLGLLLKK | 28     | 42.86 %              | 0.444 | 0.177      | 0.45                          | 0.15                      | 7.00       | 11.85             | 15                | 94         | -0.06                              | 0.34          | 267.87                             | 40.00                                       | 1.22                 | 0.91                    |
| P1F6 | KLKLLGLLLKGGGMSPSILKHWSRQ   | 28     | 42.86 %              | 0.444 | 0.252      | 0.52                          | 0.15                      | 7.00       | 11.85             | 15                | 85         | -0.06                              | 0.35          | 119.22                             | 30.00                                       | 1.22                 | 0.91                    |
| F6P6 | MSPSILKHWSRQGGGKLLGLLLKLLK  | 28     | 42.86 %              | 0.444 | 0.158      | 0.27                          | 0.15                      | 7.00       | 11.85             | 15                | 93         | -0.06                              | 0.36          | 30.90                              | 20.00                                       | 1.22                 | 0.91                    |
| P6F6 | KKLLGLLLKLLKGGGMSPSILKHWSRQ | 28     | 42.86 %              | 0.444 | 0.386      | 0.96                          | 0.15                      | 7.00       | 11.85             | 15                | 86         | -0.06                              | 0.37          | 21.61                              | 30.00                                       | 1.22                 | 0.91                    |

Physicochemical properties of peptides were calculated by DBAASP.



table S9 In vitro biocompatibility of hybrid AMPs ( $\mu\text{g}/\text{mL}$ )

| Peptides | HL <sub>10</sub> | CSI (hRBCs) | CT <sub>10</sub> | CSI (HEK293 cells) |
|----------|------------------|-------------|------------------|--------------------|
| F6P1     | >256             | 256         | 64               | 32                 |
| P1F6     | >256             | 128         | >256             | 64                 |
| F6P6     | >256             | 64          | 256              | 16                 |
| P6F6     | 256              | 32          | 256              | 16                 |

HL<sub>10</sub>: lowest AMPs concentration that induces 10% hemolysis. CT<sub>10</sub>: lowest AMPs concentration that causes 10% cell death. CSI: cell selectivity index = HL<sub>10</sub>/MIC or CT<sub>10</sub>/ MIC

table S10  $\alpha$ -Helical and  $\beta$ -sheet content of AMPs

|           | F6P1     |         |          | F6P6     |         |          |
|-----------|----------|---------|----------|----------|---------|----------|
|           | 10mM PBS | 50% TFE | 30mM SDS | 10mM PBS | 50% TFE | 30mM SDS |
| Helix (%) | 11.96%   | 75.02%  | 66.53%   | 6.54%    | 66.87%  | 51.87%   |
| Beta (%)  | 9.88%    | 0.22%   | 0.34%    | 10.99%   | 0.51%   | 3.29%    |

The secondary structure content of the peptides was estimated using K2D3.

## Data S1

The data in the pictures are presented in the corresponding tables:

Fig.1

Fig.3

Fig.5

Fig.6

Fig.7

Fig.8

Fig.9

fig. S3

fig. S6

fig. S7

fig. S8

fig. S9

fig. S13

fig. S14

fig. S15

fig. S16

fig. S17
